# Supplementary material for: Combined inhibition of BETs and HDACs as a potential epigenetics-based therapy for malignant rhabdoid tumor
Source: Research Square preprint supplement (doi:10.21203/rs.3.rs-8429080/v1), 2026-01-29
Supplement: Supplementary file 1 [file 011ad201dcb83df534fedd96.docx]

**Supplementary methods**

**Targeted gene sequencing**

Genomic DNA was extracted from either cell line lysates or five 10-μm sections of formalin-fixed paraffin-embedded (FFPE) tissue using the DNeasy Blood & Tissue Kit (QIAGEN, 69504) or QIAamp DNA FFPE Kit (QIAGEN, 56404), respectively, according to the manufacturer’s protocols. DNA quality was evaluated by spectrophotometry, with optical density (OD) measured at 230, 260, and 280 nm. DNA concentration was quantified using Qubit 4.0 software. Library preparation was performed as previously described [1]. Target enrichment was carried out by hybridization capture using the Sarcopact™ tumor gene panel (481 cancer-relevant genes, Geneseeq Technology Inc.) with the xGen Lockdown Hybridization and Wash Reagents Kit (Integrated DNA Technologies). Captured libraries were bound to Dynabeads M-270 (Life Technologies), amplified with KAPA HiFi HotStart ReadyMix (KAPA Biosystems), and quantified by qPCR using the KAPA Library Quantification kit (KAPA Biosystems). Sequencing was performed on the Nextseq550Dx platform (Illumina) with 2 × 150 bp paired-end reads. Raw sequencing data were demultiplexed using bcl2fastq (v2.19) and trimmed with Trimmomatic. Reads containing Ns or with low quality (quality score < 15) were removed, and the remaining reads were aligned to the human reference genome (hg19) using Burrows–Wheeler Aligner. PCR duplicates were removed with Picard (https://broadinstitute.github.io/picard/). Local realignment around indels and base quality recalibration were performed using the Genome Analysis Toolkit (GATK). Variant calling for single-nucleotide polymorphisms (SNPs) and indels was conducted with HaplotypeCaller/UnifiedGenotyper in GATK and VarScan2, applying a minimum of three variant-supporting reads and a mutant allele frequency (MAF) threshold of 0.5%. Common polymorphisms were filtered against dbSNP and the 1000 Genomes Project. Germline variants were excluded by comparison with matched whole-blood controls. An in-house database of recurrent sequencing artifacts, derived from >10,000 healthy individuals sequenced on the same platform, was used to further filter somatic calls. Gene fusions were identified using FACTERA, and copy number variations (CNVs) were analyzed with ADTEx. A log₂ ratio threshold of 2.0 was applied for copy number gains in tissue samples, while a threshold of 0.67 was used for losses in all samples; these thresholds were validated by droplet digital PCR (ddPCR)–based absolute copy number detection. Allele-specific CNV analysis was performed using FACETS, and segments with a drift threshold > 0.2 were classified as unstable. Chromosomal instability (CIN) proportion was calculated as the total length of drifted segments divided by the total genome segment length.

**References**

1. Shen Y, Zhao L, Li A, Peng Q, Liu Q, Wang L, Liu Z. Rare myxoid pleomorphic liposarcoma: a case report and literature review. *J Clin Pathol* **77**, 358-362 (2024).

https://doi: 10.1136/jcp-2023-209223.

**Supplementary Figure Legends**

**Figure S1. Transcriptional profiling of A204 cells treated with LBH589 and/or OTX015.**
**(A)** Principal component analysis (PCA) of RNA‑sequencing data from A204 cells treated for 16 h with DMSO (control), LBH589, OTX015, or the combination of both drugs. Each condition includes three biological replicates. **(B)** Volcano plots showing differentially expressed genes after treatment with LBH589 (left), OTX015 (middle), or the combination (right), compared to the DMSO control. Grey dots denote transcripts without significant change; red and blue dots indicate up‑regulated and down‑regulated transcripts, respectively. **(C)** Venn diagram illustrating the overlap of differentially expressed genes across the three treatment conditions. **(D, E)** Heatmaps displaying differentially expressed genes associated with the S‑phase **(D)** and G₂/M‑phase **(E)** of the cell cycle.

**Figure S2. Transcriptional response of G401 cells to LBH589 or OTX015 treatment.**

**(A)** Principal component analysis (PCA) of RNA‑sequencing data from G401 cells treated for 16 h with DMSO (control), LBH589, or OTX015. Three biological replicates were included per condition. **(B)** Volcano plots showing differentially expressed genes after treatment with LBH589 (left) or OTX015 (right) relative to the DMSO control. Grey dots indicate transcripts without significant change; red and blue dots denote up‑regulated and down‑regulated transcripts, respectively. **(C)** Venn diagram comparing differentially expressed genes between LBH589 and OTX015 treatments. **(D, E)** Gene set enrichment pathway analysis of significantly down‑regulated genes after 16 h treatment with LBH589 **(D)** or OTX015 **(E)**. **(F, G)** Transcription‑factor motif enrichment analysis based on GSEA for LBH589 **(F)** or OTX015 **(G)** treatment compared to the DMSO control.

**Figure S3. Suppression of E2F1 activity by combined HDAC and BET inhibition.**
**(A)** Heatmaps displaying expression patterns of E2F1 target genes involved in cell cycle, apoptosis, DNA damage response, metabolism, and other cellular processes, based on RNA‑seq data from Figure 2. **(B, C)** RT‑qPCR quantification of E2F1‑regulated cell‑cycle genes in A204 **(B)** and G401 **(C)** cells after 16 h treatment with LBH589 and/or OTX015.

**Figure S4. *In vivo* suppression of E2F1 target genes by combined LBH589 and OTX015 treatment.**

Expression of the E2F1‑regulated genes CCNE2, CDK1, CDK2, CDC6, and E2F2 was measured by RT‑qPCR in A204 xenograft tumors from the indicated treatment groups. mRNA levels were normalized to GAPDH.
