# Supplementary material for: Combined inhibition of BETs and HDACs as a potential epigenetics-based therapy for malignant rhabdoid tumor
Source: Research Square preprint supplement (doi:10.21203/rs.3.rs-8429080/v1), 2026-01-29
Supplement: Supplementary file 2 [file 9c2f9e17938d0424ba77c033.xlsx]

## Sheet: Table S1
Supplementary Table 1. Genomic alterations in MRT cell lines
Cell line	Gene	Type of mutation	Allele Fraction	TMB
A204	SMARCB1	CNV	CN:1.0	4.8
	SMARCB1	c.543_544del (p.Q182Afs*28)	0.9102
	BRIP1	c.2392C>T (p.R798*)	0.5139
G401	SMARCB1	-	CN:0.10	1
	TP53	c.783-75_861del	0.3121
	TP53	c.830G>T (p.C277F)	0.1328
	FGFR2	c.2191G>A (p.E731K)	0.0369
	PDGFRA	c.577G>A (p.V193I)	0.026
	SMO	c.203C>G (p.A68G)	0.2902
	TSHR	c.344C>A (p.T115N)	0.0238

## Sheet: Table S2
Supplementary Table 2. Detail information of 181 epigenetic compounds
Catalog Number	Product Name	Plate Location	Rack Number	M.w.	CAS Number	Target	DMSO (mg/mL)Max Solubility	DMSO (mM)Max Solubility	water (mg/mL)Max Solubility	water (mM)Max Solubility	URL	Information	Pathway	Formula	Form	Synonyms	SMILES	ALogP	HBA_Count	HBD_Count	RotatableBond
S1004	Veliparib (ABT-888)	a1	L1900-01	244.29	912444-00-9	PARP	17	69.5894	<1		http://www.selleckchem.com/products/ABT-888.html	Veliparib (ABT-888) is a potent inhibitor of PARP1 and PARP2 with Ki of 5.2 nM and 2.9 nM, respectively. It is inactive to SIRT2. Phase 1/2.	DNA Damage	C13H16N4O	Free Base	N/A	C[C@@]1(CCCN1)C1=NC2=C(C=CC=C2N1)C(N)=O |r,c:11,13,t:7,9|	0.986	2	3	2
S1007	Roxadustat (FG-4592)	b1	L1900-01	352.34	808118-40-3	HIF	70	198.672	<1		http://www.selleckchem.com/products/fg-4592.html	FG-4592 is an HIF α prolyl hydroxylase inhibitor, stabilizes HIF-2 and induces EPO production. Phase 2/3.	Angiogenesis	C19H16N2O5	Free Base	N/A	CC1=NC(C(=O)NCC(O)=O)=C(O)C2=C1C=C(OC1=CC=CC=C1)C=C2 |c:13,21,23,26,t:1,10,16,19|	2.306	4	2	5
S1030	Panobinostat (LBH589)	c1	L1900-01	349.43	404950-80-7	HDAC	69	197.464	<1		http://www.selleckchem.com/products/LBH-589.html	Panobinostat (LBH589) is a novel broad-spectrum HDAC inhibitor with IC50 of 5 nM. Phase 3.	Epigenetics	C21H23N3O2	Free Base	N/A	CC1=C(CCNCC2=CC=C(\C=C\C(=O)NO)C=C2)C2=C(N1)C=CC=C2 |c:1,17,20,24,26,t:7,9|	3.194	1	3	7
S1045	Trichostatin A (TSA)	d1	L1900-01	302.4	58880-19-6	HDAC	23	76.0582	<1		http://www.selleckchem.com/products/Trichostatin-A.html	Trichostatin A (TSA) is an HDAC inhibitor with IC50 of ~1.8 nM – HDAC8 is the only known member of the HDAC-family that is not affected by TSA. Phase 3.	Others	C17H22N2O3	Free Base	TSA	C[C@H](\C=C(C)\C=C\C(=O)NO)C(=O)C1=CC=C(C=C1)N(C)C |r,c:15,17,t:13|	2.772	2	1	6
S1047	Vorinostat (SAHA, MK0683)	e1	L1900-01	264.3	149647-78-9	Autophagy,HDAC	53	200.53	<1		http://www.selleckchem.com/products/Vorinostat-(SAHA).html	Vorinostat (suberoylanilide hydroxamic acid, SAHA) is an HDAC inhibitor with IC50 of ~10 nM.	Endocrinology & Hormones	C14H20N2O3	Free Base	Zolinza, MK-0683	ONC(=O)CCCCCCC(=O)NC1=CC=CC=C1 |c:15,17,t:13|	2.005	2	2	8
S1048	Tozasertib (VX-680, MK-0457)	f1	L1900-01	464.59	639089-54-6	Aurora Kinase	93	200.176	<1		http://www.selleckchem.com/products/VX-680(MK-0457).html	VX-680 (Tozasertib, MK-0457) is a pan-Aurora inhibitor, mostly against Aurora A with Kiapp of 0.6 nM, less potent towards Aurora B/Aurora C and 100-fold more selective for Aurora A than 55 other kinases. Phase 2.	Endocrinology & Hormones	C23H28N8OS	Free Base	N/A	CN1CCN(CC1)C1=NC(SC2=CC=C(NC(=O)C3CC3)C=C2)=NC(NC2=NNC(C)=C2)=C1 |c:23,25,33,35,t:8,12,14,29|	4.445	4	3	7
S1053	Entinostat (MS-275)	g1	L1900-01	376.41	209783-80-2	HDAC	75	199.251	<1		http://www.selleckchem.com/products/MS-275.html	Entinostat (MS-275) strongly inhibits HDAC1 and HDAC3 with IC50 of 0.51 μM and 1.7 μM, compared with HDACs 4, 6, 8, and 10. Phase 1/2.	Transmembrane Transporters	C21H20N4O3	Free Base	SNDX-275	NC1=CC=CC=C1NC(=O)C1=CC=C(CNC(=O)OCC2=CN=CC=C2)C=C1 |c:3,5,23,25,28,t:1,11,13,21|	2.071	4	3	7
S1060	Olaparib (AZD2281, Ku-0059436)	h1	L1900-01	434.46	763113-22-0	PARP	86	197.947	0.002	0.00460342	http://www.selleckchem.com/products/AZD2281(Olaparib).html	Olaparib (AZD2281, KU0059436) is a selective inhibitor of PARP1/2 with IC50 of 5 nM/1 nM, 300-times less effective against tankyrase-1. Phase 1/2.	Protein Tyrosine Kinase	C24H23FN4O3	Free Base	KU-0059436	FC1=C(C=C(CC2=NNC(=O)C3=C2C=CC=C3)C=C1)C(=O)N1CCN(CC1)C(=O)C1CC1 |c:11,14,16,19,t:1,3,6|	2.127	4	1	4
S1085	Belinostat (PXD101)	a2	L1900-01	318.35	414864-00-9	HDAC	64	201.037	<1		http://www.selleckchem.com/products/Belinostat.html	Belinostat (PXD101) is a novel HDAC inhibitor with IC50 of 27 nM, with activity demonstrated in cisplatin-resistant tumors. Phase 1/2.	Others	C15H14N2O4S	Free Base	N/A	ONC(=O)\C=C\C1=CC(=CC=C1)S(=O)(=O)NC1=CC=CC=C1 |c:8,10,19,21,t:6,17|	1.8	3	2	5
S1087	Iniparib (BSI-201)	b2	L1900-01	292.03	160003-66-7	PARP	58	198.61	<1		http://www.selleckchem.com/products/BSI-201.html	BSI-201 (Iniparib, SAR240550) is a PARP1 inhibitor with demonstrated effectiveness in triple-negative breast cancer (TNBC). Phase 3.	Others	C7H5IN2O3	Free Base	SAR240550	NC(=O)C1=CC(=C(I)C=C1)[N+]([O-])=O |c:8,t:3,5|	1.304	1	1	2
S1090	Abexinostat (PCI-24781)	c2	L1900-01	397.42	783355-60-2	HDAC	80	201.298	<1		http://www.selleckchem.com/products/PCI-24781.html	PCI-24781 is a novel pan-HDAC inhibitor mostly targeting HDAC1 with Ki of 7 nM, modest potent to HDACs 2, 3, 6, and 10 and greater than 40-fold selectivity against HDAC8. Phase 1/2.	Others	C21H23N3O5	Free Base	CRA-02478	CN(C)CC1=C(OC2=CC=CC=C12)C(=O)NCCOC1=CC=C(C=C1)C(=O)NO |c:9,23,25,t:4,7,11,21|	2.353	4	2	8
S1095	Dacinostat (LAQ824)	d2	L1900-01	379.459	404951-53-7	HDAC	76	200.285	<1		http://www.selleckchem.com/products/LAQ824(NVP-LAQ824).html	LAQ824 (Dacinostat) is a novel HDAC inhibitor with IC50 of 32 nM and is known to activate the p21 promoter.	Others	C22H25N3O3	Free Base	N/A	OCCN(CCC1=CNC2=C1C=CC=C2)CC1=CC=C(\C=C\C(=O)NO)C=C1 |c:9,12,14,28,t:6,18,20|	3.045	1	3	9
S1096	Quisinostat (JNJ-26481585) 2HCl	e2	L1900-01	394.476	875320-31-3	HDAC	79	200.266	<1		http://www.selleckchem.com/products/JNJ-26481585.html	JNJ-26481585 is a novel second-generation HDAC inhibitor with highest potency for HDAC1 with IC50 of 0.11 nM, modest potent to HDACs 2, 4, 10, and 11; greater than 30-fold selectivity against HDACs 3, 5, 8, and 9 and lowest potency to HDACs 6 and 7. Phase 2.	Others	C21H28Cl2N6O2	Dihydrochloride	N/A	Cl.Cl.CN1C=C(CNCC2CCN(CC2)C2=NC=C(C=N2)C(=O)NO)C2=CC=CC=C12 |c:16,18,27,t:2,14,25,29|	2.749	3	2	6
S1098	Rucaparib (AG-014699,PF-01367338) phosphate	f2	L1900-01	421.36	459868-92-9	PARP	84	199.354	<1		http://www.selleckchem.com/products/AG-014699.html	Rucaparib (AG-014699, PF-01367338) is an inhibitor of PARP with Ki of 1.4 nM for PARP1, also showing binding affinity to eight other PARP domains. Phase 1/2.	Others	C19H21FN3O5P	Phosphate	AG-014447	OP(O)(O)=O.CNCC1=CC=C(C=C1)C1=C2CCNC(=O)C3=CC(F)=CC(N1)=C23 |c:9,11,14,24,t:7,21,28|	2.49	1	3	3
S1100	MLN8054	g2	L1900-01	476.86	869363-13-3	Aurora Kinase	95	199.22	<1		http://www.selleckchem.com/products/MLN8054.html	MLN8054 is a potent and selective inhibitor of Aurora A with IC50 of 4 nM. It is more than 40-fold selective for Aurora A than Aurora B. Phase 1.	Others	C25H15ClF2N4O2	Free Base	N/A	OC(=O)C1=CC=C(NC2=NC3=C(CN=C(C4=CC(Cl)=CC=C34)C3=C(F)C=CC=C3F)C=N2)C=C1 |c:13,18,24,27,29,33,36,t:3,5,8,10,15,20|	6.192	4	1	4
S1103	ZM 447439	h2	L1900-01	513.59	331771-20-1	Aurora Kinase	103	200.549	<1		http://www.selleckchem.com/products/ZM-447439.html	ZM 447439 is a selective and ATP-competitive inhibitor for Aurora A and Aurora B with IC50 of 110 nM and 130 nM, respectively. It is more than 8-fold selective for Aurora A/B than MEK1, Src, Lck and has little effect againstCDK1/2/4, Plk1, Chk1, etc.	Others	C29H31N5O4	Free Base	N/A	COC1=C(OCCCN2CCOCC2)C=C2N=CN=C(NC3=CC=C(NC(=O)C4=CC=CC=C4)C=C3)C2=C1 |c:2,17,31,33,36,40,t:15,19,22,24,29|	4.118	6	2	10
S1107	Danusertib (PHA-739358)	a3	L1900-01	474.55	827318-97-8	Aurora Kinase,Bcr-Abl,c-RET,FGFR	95	200.19	<1		http://www.selleckchem.com/products/PHA-739358(Danusertib).html	Danusertib (PHA-739358) is an Aurora kinase inhibitor for Aurora A/B/C with IC50 of 13 nM/79 nM/61 nM, modestly potent to Abl, TrkA, c-RET and FGFR1, and less potent to Lck, VEGFR2/3, c-Kit, CDK2, etc. Phase 2.	Others	C26H30N6O3	Free Base	N/A	CO[C@@H](C(=O)N1CC2=C(C1)C(NC(=O)C1=CC=C(C=C1)N1CCN(C)CC1)=NN2)C1=CC=CC=C1 |r,c:7,17,19,29,35,37,t:15,33|	2.337	4	2	6
S1122	Mocetinostat (MGCD0103)	b3	L1900-01	396.44	726169-73-9	HDAC	13	32.7918	<1		http://www.selleckchem.com/products/MGCD0103(Mocetinostat).html	Mocetinostat (MGCD0103) is a potent HDAC inhibitor with most potency for HDAC1 with IC50 of 0.15 μM, 2- to 10- fold selectivity against HDAC2, 3, and 11, and no activity to HDAC4, 5, 6, 7, and 8. Phase 1/2.	Others	C23H20N6O	Free Base	N/A	NC1=CC=CC=C1NC(=O)C1=CC=C(CNC2=NC=CC(=N2)C2=CC=CN=C2)C=C1 |c:3,5,19,21,26,28,31,t:1,11,13,17,24|	2.798	4	3	6
S1129	SRT1720 HCl	c3	L1900-01	506.02	1001645-58-4	Sirtuin	38	75.0958	<1		http://www.selleckchem.com/products/SRT1720.html	SRT1720 is a selective SIRT1 activator with EC50 of 0.16 μM, but is >230-fold less potent for SIRT2 and SIRT3.	Others	C25H24ClN7OS	Hydrochloride	N/A	Cl.O=C(NC1=CC=CC=C1C1=CN2C(CN3CCNCC3)=CSC2=N1)C1=NC2=CC=CC=C2N=C1 |c:5,7,21,25,32,34,37,t:3,10,28,30|	3.018	4	2	5
S1132	INO-1001 (3-Aminobenzamide)	d3	L1900-01	136.15	3544-24-9	PARP	27	198.311	<1		http://www.selleckchem.com/products/INO-1001.html	INO-1001 is a potent inhibitor of PARP with IC50 of <50 nM in CHO cells and a mediator of oxidant-induced myocyte dysfunction during reperfusion. Phase 2.	Others	C7H8N2O	Free Base	N/A	NC(=O)C1=CC(N)=CC=C1 |c:6,8,t:3|	0.085	1	2	1
S1133	Alisertib (MLN8237)	e3	L1900-01	518.92	1028486-01-2	Aurora Kinase	27	52.0311	<1		http://www.selleckchem.com/products/MLN8237.html	Alisertib (MLN8237) is a selective Aurora A inhibitor with IC50 of 1.2 nM. It has >200-fold higher selectivity for Aurora A than Aurora B. Phase 3.	Others	C27H20ClFN4O4	Free Base	Alisertib	COC1=C(C=CC(NC2=NC3=C(CN=C(C4=C3C=CC(Cl)=C4)C3=C(OC)C=CC=C3F)C=N2)=C1)C(O)=O |c:4,13,15,18,21,24,28,30,34,36,t:2,8,10|	5.954	6	1	6
S1134	AT9283	f3	L1900-01	381.43	896466-04-9	Aurora Kinase,Bcr-Abl,JAK	76	199.25	<1		http://www.selleckchem.com/products/AT9283.html	AT9283 is a potent JAK2/3 inhibitor with IC50 of 1.2 nM/1.1 nM; also potent to Aurora A/B, Abl(T315I). Phase 1/2.	Others	C19H23N7O2	Free Base	N/A	O=C(NC1CC1)NC1=CNN=C1C1=NC2=CC(CN3CCOCC3)=CC=C2N1 |c:11,26,28,t:8,14,16|	1.51	4	4	5
S1143	AG-490 (Tyrphostin B42)	g3	L1900-01	294.3	133550-30-8	EGFR,JAK	59	200.476	<1		http://www.selleckchem.com/products/AG-490.html	AG-490 (Tyrphostin B42) is an inhibitor of EGFR with IC50 of 0.1 μM, 135-fold more selective for EGFR versus ErbB2, also inhibits JAK2 with no activity to Lck, Lyn, Btk, Syk and Src.	Others	C17H14N2O3	Free Base	N/A	OC1=C(O)C=C(\C=C(/C#N)C(=O)NCC2=CC=CC=C2)C=C1 |c:1,16,18,21,t:4,14|	2.444	1	3	4
S1147	Barasertib (AZD1152-HQPA)	h3	L1900-01	507.56	722544-51-6	Aurora Kinase	102	200.961	<1		http://www.selleckchem.com/products/AZD1152-HQPA.html	AZD1152-HQPA (Barasertib) is a highly selective Aurora B inhibitor with IC50 of 0.37 nM, ~100 fold more selective for Aurora B over Aurora A.	Others	C26H30FN7O3	Free Base	AZD1152	CCN(CCO)CCCOC1=CC=C2C(NC3=CC(CC(=O)NC4=CC=CC(F)=C4)=NN3)=NC=NC2=C1 |c:25,28,30,33,35,38,t:10,12,16,23|	3.493	5	4	13
S1154	SNS-314 Mesylate	a4	L1900-01	527.04	1146618-41-8	Aurora Kinase	105	199.226	6	11.3843	http://www.selleckchem.com/products/SNS-314.html	SNS-314 Mesylate is a potent and selective inhibitor of Aurora A, Aurora B and Aurora C with IC50 of 9 nM, 31 nM, and 3 nM, respectively. It is less potent to Trk A/B, Flt4, Fms, Axl, c-Raf and DDR2. Phase 1.	Others	C19H19ClN6O4S3	Mesylate	N/A	CS(O)(=O)=O.ClC1=CC=CC(NC(=O)NC2=NC=C(CCNC3=NC=NC4=C3SC=C4)S2)=C1 |c:7,23,25,29,33,t:5,14,16,21|	3.539	4	3	6
S1168	Valproic acid sodium salt (Sodium valproate)	b4	L1900-01	166.19	1069-66-5	GABA Receptor,HDAC,Autophagy	33	198.568	33	198.568	http://www.selleckchem.com/products/Sodium-valproate.html	Valproic acid sodium salt (Sodium valproate) is a HDAC inhibitor with IC50 of 0.4 mM and also inhibits GABA-transaminase or succinic semialdehyde dehydrogenase.	Neuronal Signaling	C8H15NaO2	Sodium salt	N/A	[Na+].CCCC(CCC)C([O-])=O	1.275	0	0	5
S1171	CYC116	c4	L1900-01	368.46	693228-63-6	Aurora Kinase,VEGFR	24	65.136	<1		http://www.selleckchem.com/products/CYC116.html	CYC116 is a potent inhibitor of Aurora A/B with Ki of 8.0 nM/9.2 nM, is less potent to VEGFR2 (Ki of 44 nM), with 50-fold greater potency than CDKs, not active against PKA, Akt/PKB, PKC, no effect on GSK-3α/β, CK2, Plk1 and SAPK2A. Phase 1.	Cell Cycle	C18H20N6OS	Free Base	N/A	CC1=C(SC(N)=N1)C1=NC(NC2=CC=C(C=C2)N2CCOCC2)=NC=C1 |c:5,14,16,25,27,t:1,8,12|	2.743	4	2	4
S1181	ENMD-2076	d4	L1900-01	375.47	934353-76-1	Aurora Kinase,FLT3,VEGFR	105	279.65	1	2.66333	http://www.selleckchem.com/products/ENMD-2076.html	ENMD-2076 has selective activity against Aurora A and Flt3 with IC50 of 14 nM and 1.86 nM, 25-fold selective for Aurora A than over Aurora B and less potent to VEGFR2/KDR and VEGFR3, FGFR1 and FGFR2 and PDGFRα. Phase 2.	Angiogenesis	C21H25N7	Tartaric Acid	N/A	CN1CCN(CC1)C1=CC(NC2=NNC(C)=C2)=NC(\C=C\C2=CC=CC=C2)=N1 |c:16,18,25,27,29,t:8,12,23|	4.015	3	2	5
S1194	CUDC-101	e4	L1900-01	434.49	1012054-59-9	EGFR,HDAC,HER2	20	46.031	<1		http://www.selleckchem.com/products/CUDC-101.html	CUDC-101 is a potent multi-targeted inhibitor against HDAC, EGFR and HER2 with IC50 of 4.4 nM, 2.4 nM, and 15.7 nM, and inhibits class I/II HDACs, but not class III, Sir-type HDACs. Phase 1.	Epigenetics	C24H26N4O4	Free Base	N/A	COC1=CC2=C(C=C1OCCCCCCC(=O)NO)C(NC1=CC(=CC=C1)C#C)=NC=N2 |c:4,6,24,26,30,32,t:2,22|	5.376	5	2	11
S1200	Decitabine	f4	L1900-01	228.21	2353-33-5	DNA Methyltransferase	45	197.187	10	43.8193	http://www.selleckchem.com/products/Decitabine.html	Decitabine is a potent inhibitor of DNA methylation with IC50 of 438 nM and 4.38 nM in HL-60 and KG1a cells, respectively.	Epigenetics	C8H12N4O4	Free Base	Dacogen	NC1=NC(=O)N(C=N1)[C@H]1C[C@H](O)[C@@H](CO)O1 |r,c:6,t:1|	-1.093	4	3	2
S1216	PFI-1 (PF-6405761)	g4	L1900-01	347.39	1403764-72-6	Epigenetic Reader Domain	69	198.624	<1		http://www.selleckchem.com/products/pfl-1.html	PFI-1 is a selective BET (bromodomain-containing protein) inhibitor for BRD4 with IC50 of 0.22 μM.	Epigenetics	C16H17N3O4S	Free Base	PF-06405761	COC1=C(C=CC=C1)S(=O)(=O)NC1=CC=C2NC(=O)N(C)CC2=C1 |c:4,6,24,t:2,13,15|	1.376	4	2	4
S1233	2-Methoxyestradiol (2-MeOE2)	h4	L1900-01	302.41	362-07-2	HIF	60	198.406	<1		http://www.selleckchem.com/products/2-Methoxyestradiol(2ME2).html	2-Methoxyestradiol depolymerizes microtubules and blocks HIF-1α nuclear accumulation and HIF-transcriptional activity. Phase 2.	Angiogenesis	C19H26O3	Free Base	2-ME2	[H][C@@]12CC[C@H](O)[C@@]1(C)CC[C@]1([H])C3=CC(OC)=C(O)C=C3CC[C@@]21[H] |r,c:20,t:13,17|	3.821	1	2	1
S1249	JNJ-7706621	a5	L1900-01	394.36	443797-96-4	Aurora Kinase,CDK	79	200.325	<1		http://www.selleckchem.com/products/JNJ-7706621.html	JNJ-7706621 is pan-CDK inhibitor with the highest potency on CDK1/2 with IC50 of 9 nM/4 nM and showing >6-fold selectivity for CDK1/2 than CDK3/4/6. It also potently inhibits Aurora A/B and has no activity on Plk1 and Wee1.	Cell Cycle	C15H12F2N6O3S	Free Base	N/A	NC1=NC(NC2=CC=C(C=C2)S(N)(=O)=O)=NN1C(=O)C1=C(F)C=CC=C1F |c:7,9,15,21,24,26,t:1,5|	2.226	5	3	4
S1327	Ellagic acid	b5	L1900-01	302.19	476-66-4	Topoisomerase		10			http://selleckchem.com/products/Ellagic-acid.html	Ellagic acid has antiproliferative and antioxidant property.	DNA Damage	C14H6O8	Free Base	N/A	OC1=CC2=C3C(OC(=O)C4=CC(O)=C(O)C(OC2=O)=C34)=C1O |c:3,22,t:1,9,12,19|
S1378	Ruxolitinib (INCB018424)	c5	L1900-01	306.37	941678-49-5	JAK	61	199.106	<1		http://www.selleckchem.com/products/INCB18424.html	INCB018424 is the first potent, selective, JAK1/2 inhibitor to enter the clinic with IC50 of 3.3 nM/2.8 nM, >130-fold selectivity for JAK1/2 versus JAK3. Phase 3.	JAK/STAT	C17H18N6	Free Base	N/A	N#CC[C@H](C1CCCC1)N1C=C(C=N1)C1=NC=NC2=C1C=CN2 |r,c:11,13,18,20,23,t:16|	2.88	3	1	4
S1393	Pirarubicin	d5	L1900-01	627.64	72496-41-4	Topoisomerase	7	11.1529	<1		http://selleckchem.com/products/Pirarubicin.html	Pirarubicin is an anthracycline antibiotic, and also a DNA/RNA synthesis inhibitor by intercalating into DNA and interacts with topoisomerase II, used as an antineoplastic agent.	DNA Damage	C32H37NO12	Free Base	N/A	[H][C@]1(CCCCO1)O[C@H]1[C@@H](N)C[C@H](O[C@@]2([H])C[C@@](O)(CC3=C2C(O)=C2C(=O)C4=C(C=CC=C4OC)C(=O)C2=C3O)C(=O)CO)O[C@H]1C |r,c:21,31,33,41,t:25,29|	1.091	8	4	7
S1396	Resveratrol	e5	L1900-01	228.24	501-36-0	Autophagy,Sirtuin	45	197.161	<1		http://www.selleckchem.com/products/Resveratrol.html	Resveratrol is a phytoalexin produced naturally by several plants with anti-cancer, anti-inflammatory, blood-sugar-lowering and other beneficial cardiovascular effects.	Epigenetics	C14H12O3	Free Base	N/A	OC1=CC=C(\C=C\C2=CC(O)=CC(O)=C2)C=C1 |c:10,13,16,t:1,3,7|	3.09	0	3	2
S1422	Droxinostat	f5	L1900-01	243.69	99873-43-5	HDAC	49	201.075	<1		http://www.selleckchem.com/products/Droxinostat.html	Droxinostat (CMH, 5809354) is a selective inhibitor of HDAC, mostly for HDACs 6 and 8 with IC50 of 2.47μM and 1.46 μM, greater than 8-fold selective against HDAC3 and no inhibition to HDAC1, 2, 4, 5, 7, 9, and 10.	Cytoskeletal Signaling	C11H14ClNO3	Free Base	N/A	CC1=CC(Cl)=CC=C1OCCCC(=O)NO |c:4,6,t:1|	2.4	2	1	5
S1451	Aurora A Inhibitor I	g5	L1900-01	588.07	1158838-45-9	Aurora Kinase	118	200.656	<1		http://www.selleckchem.com/products/Aurora-A-Inhibitor-I.html	Aurora A Inhibitor I is a novel, potent, and selective inhibitor of Aurora A with IC50 of 3.4 nM. It is 1000-fold more selective for Aurora A than Aurora B.	Cell Cycle	C31H31ClFN7O2	Free Base	N/A	CCN1CCN(CC1)C(=O)CC1=CC=C(NC2=NC(NC3=CC=C(C=C3)C(=O)NC3=CC=CC=C3Cl)=C(F)C=N2)C=C1 |c:23,25,33,35,41,44,t:12,14,17,21,31,38|	5.621	4	3	9
S1454	PHA-680632	h5	L1900-01	501.62	398493-79-3	Aurora Kinase	100	199.354	<1		http://www.selleckchem.com/products/PHA-680632.html	PHA-680632 is potent inhibitor of Aurora A, Aurora B and Aurora C with IC50 of 27 nM, 135 nM and 120 nM, respectively. It has 10- to 200-fold higher IC50 for FGFR1, FLT3, LCK, PLK1, STLK2, and VEGFR2/3.	Cell Cycle	C28H35N7O2	Free Base	N/A	CCC1=CC=CC(CC)=C1NC(=O)N1CC2=C(C1)C(NC(=O)C1=CC=C(C=C1)N1CCN(C)CC1)=NN2 |c:4,8,16,26,28,38,t:2,24|	4.339	3	3	6
S1463	Ofloxacin	a6	L1900-01	361.37	82419-36-1	Topoisomerase		10			http://selleckchem.com/products/Ofloxacin(Floxin).html	Ofloxacin is a synthetic broad-spectrum antimicrobial agent.	DNA Damage	C18H20FN3O4	Free Base	DL-8280, HOE-280, Exocin, Flobacin, Floxin, Floxil, Monoflocet	CC1COC2=C(N3CCN(C)CC3)C(F)=CC3=C2N1C=C(C(O)=O)C3=O |c:4,15,17,t:22|
S1484	MC1568	b6	L1900-01	314.31	852475-26-4	HDAC	13	41.3604	<1		http://www.selleckchem.com/products/MC1568.html	MC1568 is a selective HDAC inhibitor for maize HD1-A with IC50 of 100 nM. It is 34-fold more selective for HD1-A than HD1-B.	Cytoskeletal Signaling	C17H15FN2O3	Free Base	N/A	CN1C=C(\C=C\C(=O)C2=CC=CC(F)=C2)C=C1\C=C\C(=O)NO |c:10,13,16,t:2,8|	2.981	2	1	5
S1509	Norfloxacin	c6	L1900-01	319.33	70458-96-7	Topoisomerase		10			http://selleckchem.com/products/Norfloxacin(Norxacin).html	Norfloxacin is a broad-spectrum antibiotic.	DNA Damage	C16H18FN3O3	Free Base	Chibroxin, MK-366, Baccidal, Sebercim, Zoroxin	CCN1C=C(C(O)=O)C(=O)C2=CC(F)=C(C=C12)N1CCNCC1 |c:13,t:3,10,15|
S1515	Pracinostat (SB939)	d6	L1900-01	358.48	929016-96-6	HDAC	72	200.848	<1		http://www.selleckchem.com/products/SB939.html	SB939 is a potent pan-HDAC inhibitor with IC50 of 40-140 nM with exception for HDAC6. It has no activity against the class III isoenzyme SIRT I. Phase 2.	Cytoskeletal Signaling	C20H30N4O2	Free Base	N/A	CCCCC1=NC2=CC(=CC=C2N1CCN(CC)CC)\C=C\C(=O)NO |c:8,10,t:4,6|	3.71	2	1	10
S1529	Hesperadin	e6	L1900-01	516.65	422513-13-1	Aurora Kinase	103	199.361	<1		http://www.selleckchem.com/products/Hesperadin.html	Hesperadin potently inhibits Aurora B with IC50 of 250 nM. It markedly reduces the activity of AMPK, Lck, MKK1, MAPKAP-K1, CHK1 and PHK while it does not inhibit MKK1 activity in vivo.	Cell Cycle	C29H32N4O3S	Free Base	N/A	CCS(=O)(=O)NC1=CC=C2NC(=O)\C(C2=C1)=C(/NC1=CC=C(CN2CCCCC2)C=C1)C1=CC=CC=C1 |c:15,32,37,39,t:6,8,20,22,35|	4.071	3	3	8
S1541	Selisistat (EX 527)	f6	L1900-01	248.71	49843-98-3	Sirtuin	50	201.037	<1		http://www.selleckchem.com/products/EX-527.html	EX 527 is a potent and selective SIRT1 inhibitor with IC50 of 38 nM, exhibits >200-fold selectivity against SIRT2 and SIRT3.	Epigenetics	C13H13ClN2O	Free Base	SEN0014196	NC(=O)C1CCCC2=C1NC1=C2C=C(Cl)C=C1 |c:7,11,17,t:14|	3.149	1	2	1
S1782	Azacitidine	g6	L1900-01	244.2	320-67-2	DNA Methyltransferase	48	196.56	<1		http://www.selleckchem.com/products/Azacitidine(Vidaza).html	Azacitidine is a nucleoside analogue of cytidine that specifically inhibits DNA methylation by trapping DNA methyltransferases.	DNA Damage	C8H12N4O5	Free Base	5-azacytidine, Mylosar, Ladakamycin	NC1=NC(=O)N(C=N1)[C@@H]1O[C@H](CO)[C@@H](O)[C@H]1O |r,c:6,t:1|	-2.505	4	4	2
S2012	PCI-34051	h6	L1900-01	296.32	950762-95-5	HDAC	59	199.109	<1		http://www.selleckchem.com/products/pci-34051.html	PCI-34051 is a potent and specific HDAC8 inhibitor with IC50 of 10 nM. It has greater than 200-fold selectivity over HDAC1 and 6, more than 1000-fold selectivity over HDAC2, 3, and 10.	Epigenetics	C17H16N2O3	Free Base	N/A	COC1=CC=C(CN2C=CC3=C2C=C(C=C3)C(=O)NO)C=C1 |c:8,10,13,15,22,t:2,4|	2.911	2	1	4
S2018	ENMD-2076 L-(+)-Tartaric acid	a7	L1900-01	525.56	1291074-87-7	Aurora Kinase,FLT3,VEGFR	100	190.273	<1		http://selleckchem.com/products/enmd-2076-l-tartaric-acid.html	ENMD-2076 L-(+)-Tartaric acid is the tartaric acid of ENMD-2076, selective activity against Aurora A and Flt3 with IC50 of 14 nM and 1.86 nM, 25-fold more selective for Aurora A than Aurora B and less potent to VEGFR2/KDR and VEGFR3, FGFR1 and FGFR2 and PDGFRα. Phase 2.	Angiogenesis	C25H31N7O6	Free Base	N/A	O[C@H]([C@@H](O)C(O)=O)C(O)=O.CN1CCN(CC1)C1=NC(\C=C\C2=CC=CC=C2)=NC(NC2=NNC(C)=C2)=C1 |r,c:24,26,28,36,38,t:17,22,32|	-0.683	5	4	8
S2158	KW-2449	b7	L1900-01	332.4	1000669-72-6	Aurora Kinase,Bcr-Abl,FLT3	67	201.564	<1		http://www.selleckchem.com/products/KW-2449.html	KW-2449 is a multiple-targeted inhibitor, mostly for Flt3 with IC50 of 6.6 nM, modestly potent to FGFR1, Bcr-Abl and Aurora A; little effect on PDGFRβ, IGF-1R, EGFR. Phase 1.	Angiogenesis	C20H20N4O	Free Base	N/A	O=C(N1CCNCC1)C1=CC=C(\C=C\C2=NNC3=C2C=CC=C3)C=C1 |c:18,21,23,26,t:9,11,15|	2.723	2	2	3
S2162	AZD1480	c7	L1900-01	348.77	935666-88-9, 1260222-79-4 (TFA)	JAK	69	197.838	<1		http://www.selleckchem.com/products/AZD1480.html	AZD1480 is a novel ATP-competitive JAK2 inhibitor with IC50 of 0.26 nM, selectivity against JAK3 and Tyk2, and to a smaller extent against JAK1. Phase 1.	JAK/STAT	C14H14ClFN8	Free Base	N/A	C[C@H](NC1=NC=C(Cl)C(NC2=NNC(C)=C2)=N1)C1=NC=C(F)C=N1 |r,c:14,16,24,t:3,5,10,19,21|	2.645	5	3	5
S2170	Givinostat (ITF2357)	d7	L1900-01	475.97	732302-99-7	HDAC	95	199.592	<1		http://www.selleckchem.com/products/ITF2357(Givinostat).html	Givinostat (ITF2357) is a potent HDAC inhibitor for HDAC2, HDAC1B and HDAC1A with IC50 of 10 nM, 7.5 nM and 16 nM. Phase 1/2.	Cytoskeletal Signaling	C24H30ClN3O5	Chloride	N/A	O.Cl.CCN(CC)CC1=CC2=C(C=C1)C=C(COC(=O)NC1=CC=C(C=C1)C(=O)NO)C=C2 |c:8,10,22,24,31,t:6,13,20|	4.046	3	2	9
S2178	AG-14361	e7	L1900-01	320.39	328543-09-5	PARP	12	37.4544	<1		http://www.selleckchem.com/products/AG14361.html	AG14361 is a potent inhibitor of PARP1 with Ki of <5 nM. It is at least 1000-fold more potent than the benzamides.	DNA Damage	C19H20N4O	Free Base	N/A	CN(C)CC1=CC=C(C=C1)C1=NC2=CC=CC3=C2N1CCNC3=O |c:6,8,15,17,t:4,11,13|	2.576	2	1	3
S2179	Gandotinib (LY2784544)	f7	L1900-01	469.94	1229236-86-5	JAK	94	200.026	<1		http://www.selleckchem.com/products/LY2784544.html	LY2784544 is a potent JAK2 inhibitor with IC50 of 3 nM, effective in JAK2V617F, 8- and 20-fold selective versus JAK1 and JAK3. Phase 2.	JAK/STAT	C23H25ClFN7O	Free Base	N/A	CC1=NNC(NC2=NN3C(CC4=CC=C(Cl)C=C4F)=C(C)N=C3C(CN3CCOCC3)=C2)=C1 |c:16,22,33,35,t:1,6,11,13,19|	3.938	4	2	6
S2198	SGI-1776 free base	g7	L1900-01	405.42	1025065-69-3	Pim	81	199.793	<1		http://www.selleckchem.com/products/SGI-1776.html	SGI-1776 is a novel ATP competitive inhibitor of Pim1 with IC50 of 7 nM, 50- and 10-fold selective versus Pim2 and Pim3, also potent to Flt3 and haspin. Phase 1.	JAK/STAT	C20H22F3N5O	Free Base	N/A	CN1CCC(CNC2=NN3C(C=C2)=NC=C3C2=CC=CC(OC(F)(F)F)=C2)CC1 |c:11,13,15,20,27,t:7,18|	5.206	3	1	6
S2214	AZ 960	h7	L1900-01	354.36	905586-69-8	JAK	71	200.361	<1		http://www.selleckchem.com/products/AZ-960.html	AZ 960 is a novel ATP competitive JAK2 inhibitor with IC50 and Ki of <3 nM and 0.45 nM, 3-fold selectivity of AZ960 for JAK2 over JAK3.	JAK/STAT	C18H16F2N6	Free Base	N/A	C[C@H](NC1=NC(NC2=NNC(C)=C2)=C(F)C=C1C#N)C1=CC=C(F)C=C1 |r,c:11,16,26,t:3,7,13,21,23|	4.495	2	3	5
S2219	Momelotinib (CYT387)	a8	L1900-01	414.46	1056634-68-4	JAK	74	178.546	<1		http://www.selleckchem.com/products/Cyt387.html	CYT387 is an ATP-competitive inhibitor of JAK1/JAK2 with IC50 of 11 nM/18 nM, ~10-fold selectivity versus JAK3. Phase 1/2.	JAK/STAT	C23H22N6O2	Free Base	CYT 11387	O=C(NCC#N)C1=CC=C(C=C1)C1=NC(NC2=CC=C(C=C2)N2CCOCC2)=NC=C1 |c:8,10,19,21,30,32,t:6,13,17|	2.857	4	2	6
S2244	AR-42	b8	L1900-01	312.36	935881-37-1	HDAC	63	201.69	<1		http://selleckchem.com/products/AR-42-HDAC-42.html	AR-42 is an HDAC inhibitor with IC50 of 30 nM. Phase 1.	Epigenetics	C18H20N2O3	Free Base	OSU-HDAC42	CC(C)[C@H](C(=O)NC1=CC=C(C=C1)C(=O)NO)C1=CC=CC=C1 |r,c:9,11,20,22,t:7,18|	2.834	2	2	5
S2391	Quercetin	c8	L1900-01	302.24	117-39-5	Src,Sirtuin,PKC,PI3K	61	201.826	<1		http://www.selleckchem.com/products/Quercetin(Sophoretin).html	Quercetin is a natural flavonoid present in vegetables, fruit and wine and is a PI3K inhibitor with IC50 of 2.4 – 5.4 &mu;M.	Epigenetics	C15H10O7	Free Base	Meletin, Quercetine	OC1=CC(O)=C2C(=O)C(O)=C(OC2=C1)C1=CC=C(O)C(O)=C1 |c:9,13,22,t:1,4,16,18|	1.63	2	5	1
S2554	Daphnetin	d8	L1900-01	178.14	486-35-1	PKA,EGFR,PKC	35	196.475	<1		http://selleckchem.com/products/Daphnetin.html	Daphnetin, a natural coumarin derivative, is a protein kinase inhibitor, inhibits EGFR, PKA and PKC with IC50 of 7.67 μM, 9.33 μM and 25.01 μM, respectively, also known to exhibit anti-inflammatory and anti-oxidant activities.	DNA Damage	C9H6O4	Free Base	N/A	OC1=CC=C2C=CC(=O)OC2=C1O |c:5,11,t:1,3|	1.415	2	2	0
S2627	Tubastatin A HCl	e8	L1900-01	371.86	1310693-92-5	HDAC	74	199	<1		http://www.selleckchem.com/products/tubastatin-a-hcl.html	Tubastatin A is a potent and selective HDAC6 inhibitor with IC50 of 15 nM. It is selective (1000-fold more) against all other isozymes except HDAC8 (57-fold more).	Epigenetics	C20H22ClN3O2	Hydrochloride	N/A	Cl.CN1CCC2=C(C1)C1=C(C=CC=C1)N2CC1=CC=C(C=C1)C(=O)NO |c:4,10,12,20,22,t:8,18|	3.463	1	1	3
S2686	NVP-BSK805 2HCl	f8	L1900-01	563.47	1092499-93-8 (free base)	JAK	113	200.543	3	5.32415	http://www.selleckchem.com/products/nvp-bsk805.html	NVP-BSK805 is a potent and selective ATP-competitive JAK2 inhibitor with IC50 of 0.5 nM,>20-fold selectivity towards JAK1, JAK3 and TYK2.	JAK/STAT	C27H30Cl2F2N6O	HCl	N/A	Cl.Cl.FC1=CC(=CC(F)=C1CN1CCOCC1)C1=C2N=C(C=NC2=CC=C1)C1=CN(N=C1)C1CCNCC1 |c:3,6,17,19,21,24,26,32,t:1,29|	3.92	4	1	5
S2692	TG101209	g8	L1900-01	509.67	936091-14-4	c-RET,FLT3,JAK	102	200.129	<1		http://www.selleckchem.com/products/tg101209.html	TG101209 is a selective JAK2 inhibitor with IC50 of 6 nM, less potent to Flt3 and RET with IC50 of 25 nM and 17 nM, ~30-fold selective for JAK2 than JAK3, sensitive to JAK2V617F and MPLW515L/K mutations.	JAK/STAT	C26H35N7O2S	Free Base	N/A	CN1CCN(CC1)C1=CC=C(NC2=NC=C(C)C(NC3=CC(=CC=C3)S(=O)(=O)NC(C)(C)C)=N2)C=C1 |c:22,24,34,37,t:8,10,13,15,20|	4.659	4	3	8
S2693	Resminostat	h8	L1900-01	349.4	864814-88-0	HDAC	70	200.343	<1		http://www.selleckchem.com/products/resminostat-ras2410.html	Resminostat dose-dependently and selectively inhibits HDAC1/3/6 with IC50 of 42.5 nM/50.1 nM/71.8 nM, less potent to HDAC8 with IC50 of 877 nM.	Epigenetics	C16H19N3O4S	Free Base	4SC-201, BYK408740	CN(C)CC1=CC=C(C=C1)S(=O)(=O)N1C=CC(\C=C\C(=O)NO)=C1 |c:6,8,15,23,t:4|	1.837	3	1	6
S2718	TAK-901	a9	L1900-01	504.64	934541-31-8	Aurora Kinase	101	200.143	<1		http://www.selleckchem.com/products/tak-901.html	TAK-901 is a novel inhibitor of Aurora A/B with IC50 of 21 nM/15 nM. It is not a potent inhibitor of cellular JAK2, c-Src or Abl. Phase 1.	Cell Cycle	C28H32N4O3S	Free Base	N/A	CCS(=O)(=O)C1=CC=CC(=C1)C1=CC(C(=O)NC2CCN(C)CC2)=C(C)C2=C1C1=C(N2)N=CC(C)=C1 |c:7,9,28,31,35,38,t:5,12,25|	4.056	4	2	5
S2719	AMG-900	b9	L1900-01	503.58	945595-80-2	Aurora Kinase	100	198.578	<1		http://www.selleckchem.com/products/amg-900.html	AMG 900 is a potent and highly selective pan-Aurora kinases inhibitor for Aurora A/B/C with IC50 of 5 nM/4 nM /1 nM. It is >10-fold selective for Aurora kinases than p38α, Tyk2, JNK2, Met and Tie2. Phase 1.	Cell Cycle	C28H21N7OS	Free Base	N/A	CC1=CSC(=C1)C1=NN=C(NC2=CC=C(OC3=C(C=CC=N3)C3=NC(N)=NC=C3)C=C2)C2=C1C=CC=C2 |c:4,19,21,27,29,32,35,38,40,t:1,7,9,12,14,17,24|	6.487	6	2	6
S2736	Fedratinib (SAR302503, TG101348)	c9	L1900-01	524.68	936091-26-8	JAK	100	190.592	<1		http://www.selleckchem.com/products/tg-101348.html	TG-101348 (SAR302503) is a selective inhibitor of JAK2 with IC50 of 3 nM, 35- and 334-fold more selective for JAK2 versus JAK1 and JAK3. Phase 1/2.	JAK/STAT	C27H36N6O3S	Free Base	N/A	CC1=C(NC2=CC=CC(=C2)S(=O)(=O)NC(C)(C)C)N=C(NC2=CC=C(OCCN3CCCC3)C=C2)N=C1 |c:1,6,8,35,38,t:4,19,22,24|	5.123	5	3	11
S2740	GSK1070916	d9	L1900-01	507.63	942918-07-2	Aurora Kinase	102	200.934	<1		http://selleckchem.com/products/gsk1070916.html	GSK1070916 is a reversible and ATP-competitive inhibitor of Aurora B/C with IC50 of 3.5 nM/6.5 nM. It displays >100-fold selectivity against the closely related Aurora A-TPX2 complex. Phase 1.	Cell Cycle	C30H33N7O	Free Base	N/A	CCN1C=C(C(=N1)C1=CC=C(NC(=O)N(C)C)C=C1)C1=C2C=C(NC2=NC=C1)C1=CC=CC(CN(C)C)=C1 |c:3,5,18,21,23,27,29,34,40,t:8,10,32|	4.841	3	2	7
S2759	CUDC-907	e9	L1900-01	508.55	1339928-25-4	HDAC,PI3K	102	200.57	<1		http://www.selleckchem.com/products/cudc-907.html	CUDC-907 is a dual PI3K and HDAC inhibitor for PI3Kα and HDAC1/2/3/10 with IC50 of 19 nM and 1.7 nM/5 nM/1.8 nM/2.8 nM, respectively. Phase 1.	Cytoskeletal Signaling	C23H24N8O4S	Free Base	N/A	COC1=CC=C(C=N1)C1=NC2=C(SC(CN(C)C3=NC=C(C=N3)C(=O)NO)=C2)C(=N1)N1CCOCC1 |c:4,6,20,22,28,31,t:2,9,11,18|	2.303	8	1	7
S2770	MK-5108 (VX-689)	f9	L1900-01	461.94	1010085-13-8	Aurora Kinase	92	199.16	<1		http://www.selleckchem.com/products/mk-5108-vx-689.html	MK-5108 (VX-689) is a highly selective Aurora A inhibitor with IC50 of 0.064 nM and is 220- and 190-fold more selective for Aurora A than Aurora B/C, while it inhibits TrkA with less than 100-fold selectivity. Phase 1.	Cell Cycle	C22H21ClFN3O3S	Free Base	N/A	OC(=O)[C@@]1(CC2=CC=CC(NC3=NC=CS3)=N2)CC[C@@H](CC1)OC1=C(F)C(Cl)=CC=C1 |r,c:7,13,16,26,30,32,t:5,11|	5.574	4	1	7
S2779	M344	g9	L1900-01	307.39	251456-60-7	HDAC	62	201.698	<1		http://www.selleckchem.com/products/m344.html	M344 is a potent HDAC inhibitor with IC50 of 100 nM and able to induce cell differentiation.	Cytoskeletal Signaling	C16H25N3O3	Free Base	N/A	CN(C)C1=CC=C(C=C1)C(=O)NCCCCCCC(=O)NO |c:5,7,t:3|	2.004	2	2	9
S2789	Tofacitinib (CP-690550,Tasocitinib)	h9	L1900-01	312.37	477600-75-2	JAK	62	198.483	<1		http://www.selleckchem.com/products/tofacitinib-cp-690550.html	Tofacitinib is a novel inhibitor of JAK3 with IC50 of 1 nM, 20- to 100-fold less potent against JAK2 and JAK1.	JAK/STAT	C16H20N6O	Free Base	Tasocitinib	C[C@@H]1CCN(C[C@@H]1N(C)C1=C2C=CNC2=NC=N1)C(=O)CC#N |r,c:10,12,16,18|	1.512	3	1	3
S2796	WP1066	a10	L1900-01	356.22	857064-38-1	JAK	71	199.315	<1		http://www.selleckchem.com/products/wp1066.html	WP1066 is a novel inhibitor of JAK2 and STAT3 with IC50 of 2.30 μM and 2.43 μM in HEL cells; shows activity to JAK2, STAT3, STAT5, and ERK1/2 not JAK1 and JAK3.	JAK/STAT	C17H14BrN3O	Free Base	N/A	C[C@H](NC(=O)C(=C\C1=NC(Br)=CC=C1)\C#N)C1=CC=CC=C1 |r,c:10,12,19,21,t:7,17|	3.566	2	1	4
S2804	Sirtinol	b10	L1900-01	394.47	410536-97-9	Sirtuin	23	58.3061	<1		http://www.selleckchem.com/products/sirtinol.html	Sirtinol is a specific SIRT1 and SIRT2 inhibitor with IC50 of 131 μM and 38 μM, respectively.	Epigenetics	C26H22N2O2	Free Base	N/A	CC(NC(=O)C1=CC=CC=C1\N=C\C1=C2C=CC=CC2=CC=C1O)C1=CC=CC=C1 |c:7,9,14,16,18,21,23,29,31,t:5,27|	5.262	2	2	5
S2806	CEP-33779	c10	L1900-01	462.57	1257704-57-6	JAK	93	201.051	<1		http://www.selleckchem.com/products/cep33779.html	CEP33779 is a selective JAK2 inhibitor with IC50 of 1.8 nM, >40- and >800-fold versus JAK1 and TYK2.	JAK/STAT	C24H26N6O2S	Free Base	N/A	CN1CCN(CC1)C1=CC=CC(NC2=NN3C=CC=C(C3=N2)C2=CC=C(C=C2)S(C)(=O)=O)=C1 |c:10,17,19,22,27,29,35,t:8,14,25|	3.86	4	1	5
S2818	Tacedinaline (CI994)	d10	L1900-01	269.3	112522-64-2	HDAC	54	200.52	<1		http://www.selleckchem.com/products/ci994-tacedinaline.html	CI-994 (Tacedinaline) is an anti-cancer drug which inhibits HDAC1 with IC50 of 0.57 μM and causes G1 cell cycle arrest. Phase 3.	Epigenetics	C15H15N3O2	Free Base	PD-123654	CC(=O)NC1=CC=C(C=C1)C(=O)NC1=C(N)C=CC=C1 |c:6,8,14,17,19,t:4|	0.988	2	3	3
S2821	RG108	e10	L1900-01	334.33	48208-26-0	DNA Methyltransferase,Transferase	67	200.401	<1		http://www.selleckchem.com/products/rg108.html	RG108 is an inhibitor of DNA methyltransferase with IC50 of 115 nM, does not cause trapping of covalent enzymes.	Epigenetics	C19H14N2O4	Free Base	N/A	[H][C@@](CC1=CNC2=C1C=CC=C2)(N1C(=O)C2=CC=CC=C2C1=O)C(O)=O |r,c:6,9,11,19,21,t:3,17|	2.677	3	1	4
S2851	Baricitinib (LY3009104, INCB028050)	f10	L1900-01	371.42	1187594-09-7	JAK	74	199.235	<1		http://www.selleckchem.com/products/baricitinib-ly3009104.html	Baricitinib is a selective JAK1 and JAK2 inhibitor with IC50 of 5.9 nM and 5.7 nM, ~70 and ~10-fold selective versus JAK3 and Tyk2, no inhibition to c-Met and Chk2. Phase 3.	Epigenetics	C16H17N7O2S	Free Base	INCB 28050	CCS(=O)(=O)N1CC(CC#N)(C1)N1C=C(C=N1)C1=NC=NC2=C1C=CN2 |c:14,16,21,23,26,t:19|	0.36	5	1	5
S2867	WHI-P154	g10	L1900-01	376.2	211555-04-3	EGFR,JAK	75	199.362	<1		http://www.selleckchem.com/products/whi-p154.html	WHI-P154 is a potent JAK3 inhibitor with IC50 of 1.8 μM, no activity against JAK1 or JAK2, also inhibits EGFR, Src, Abl, VEGFR and MAPK, prevents Stat3, but not Stat5 phosphorylation.	JAK/STAT	C16H14BrN3O3	Free Base	N/A	COC1=CC2=NC=NC(NC3=CC=C(O)C(Br)=C3)=C2C=C1OC |c:6,16,18,21,t:2,4,10,12|	3.95	4	2	4
S2886	PJ34	h10	L1900-01	295.34	344458-19-1	PARP	28	94.806	<1		http://selleckchem.com/products/pj34.html	PJ-34 is a PARP inhibitor with EC50 of 20 nM and is equally potent to PARP1/2.	DNA Damage	C17H17N3O2	Free Base	N/A	CN(C)CC(=O)NC1=CC2=C(NC(=O)C3=C2C=CC=C3)C=C1 |c:14,17,19,22,t:7,9|	1.429	2	2	3
S2902	S-Ruxolitinib (INCB018424)	a11	L1900-01	306.37	941685-37-6	JAK	61	199.106	5	16.3201	http://www.selleckchem.com/products/s-ruxolitinib.html	S-Ruxolitinib is the chirality of INCB018424, which is the first potent, selective, JAK1/2 inhibitor to enter the clinic with IC50 of 3.3 nM/2.8 nM, >130-fold selectivity for JAK1/2 versus JAK3. Phase 3.	JAK/STAT	C17H18N6	Free Base	N/A	N#CC[C@@H](C1CCCC1)N1C=C(C=N1)C1=NC=NC2=C1C=CN2 |r,c:11,13,18,20,23,t:16|	2.88	3	1	4
S2919	IOX2	b11	L1900-01	352.34	931398-72-0	HIF	7	19.8672	<1		http://www.selleckchem.com/products/iox2.html	IOX2 is a potent inhibitor of HIF-1α prolyl hydroxylase-2 (PHD2) with IC50 of 21 nM, >100-fold selectivity over JMJD2A, JMJD2C, JMJD2E, JMJD3, or the 2OG oxygenase FIH.	Angiogenesis	C19H16N2O5	Free Base	N/A	OC(=O)CNC(=O)C1=C(O)C2=C(C=CC=C2)N(CC2=CC=CC=C2)C1=O |c:7,12,14,21,23,t:10,19|	1.153	3	2	5
S3001	Clevudine	c11	L1900-01	260.22	163252-36-6	DNA/RNA Synthesis	52	199.831	52	199.831	http://selleckchem.com/products/clevudine-levovir.html	Clevudine is an antiviral drug for the treatment of hepatitis B.	DNA Damage	C10H13FN2O5	Free Base	N/A	CC1=CN([C@H]2O[C@@H](CO)[C@H](O)[C@H]2F)C(=O)NC1=O |r,t:1|	-1.065	3	3	2
S3147	Entacapone	d11	L1900-01	305.29	130929-57-6	Histone Methyltransferase	61	199.81	<1		http://www.selleckchem.com/products/entacapone.html	Entacapone inhibits catechol-O-methyltransferase(COMT) with IC50 of 151 nM.	Epigenetics	C14H15N3O5	Free Base	N/A	CCN(CC)C(=O)C(\C#N)=C\C1=CC(=C(O)C(O)=C1)[N+]([O-])=O |c:17,t:11,13|	1.658	1	2	5
S4125	Sodium Phenylbutyrate	e11	L1900-01	186.18	1716-12-7	HDAC	8	42.9692	30	161.134	https://www.selleckchem.com/products/sodium-phenylbutyrate.html	Sodium Phenylbutyrate is a transcriptional regulators that act by altering chromatin structure via the modulation of HDAC activity.	DNA Damage	C10H11NaO2	Sodium Salt	N/A	[Na]OC(=O)CCCC1=CC=CC=C1 |c:9,11,t:7|	2.497	2	0	5
S4246	Tranylcypromine (2-PCPA) HCl	f11	L1900-01	169.65	4548-34-9	MAO	33	194.518	33	194.518	http://www.selleckchem.com/products/tranylcypromine-2-pcpa-hcl.html	Tranylcypromine is a monoamine oxidase inhibitor, which inhibits CYP2A6 with Ki of 0.08 μM and 0.2 μM in cDNA-expressing microsomes and Human Liver Microsomes, respectively.	Epigenetics	C9H12ClNR	Hydrochloride	N/A	Cl.[*].N[C@@H]1C[C@H]1C1=CC=CC=C1 |r,$;relative stereochemistry_R0;;;;;;;;;;$,c:7,9,t:5|	2.309	0	1	1
S4294	Procainamide HCl	g11	L1900-01	271.79	614-39-1	DNA Methyltransferase,Sodium Channel	54	198.683	54	198.683	http://www.selleckchem.com/products/procainamide-hcl.html	Procainamide HCl is a sodium channel blocker, and also a DNA methyltransferase inhibitor, used in the treatment of cardiac arrhythmias.	Transmembrane Transporters	C13H22ClN3O	Hydrochloride	N/A	Cl.CCN(CC)CCNC(=O)C1=CC=C(N)C=C1 |c:15,t:10,12|	1.509	1	2	6
S5001	Tofacitinib (CP-690550) Citrate	h11	L1900-01	504.49	540737-29-9	JAK	100	198.22	<1		http://www.selleckchem.com/products/CP-690550.html	Tofacitinib citrate (CP-690550 citrate) is a novel inhibitor of JAK3 with IC50 of 1 nM, 20- to 100-fold less potent against JAK2 and JAK1.	JAK/STAT	C22H28N6O8	Citrate	N/A	OC(=O)CC(O)(CC(O)=O)C(O)=O.C[C@@H]1CCN(C[C@@H]1N(C)C1=C2C=CNC2=NC=N1)C(=O)CC#N |r,c:22,24,28,30|	0.193	6	1	8
S7029	AZD2461	a1	L1900-02	395.43	1174043-16-3	PARP	79	199.783	<1		https://www.selleckchem.com/products/azd2461.html	AZD2461 is a novel PARP inhibitor with low affinity for Pgp than Olaparib. Phase 1.	DNA Damage	C22H22FN3O3	Free Base	N/A	COC1CCN(CC1)C(=O)C1=CC(CC2=NNC(=O)C3=CC=CC=C23)=CC=C1F |c:22,27,29,t:11,15,20,24|	1.993	4	1	4
S7036	XL019	b1	L1900-02	444.53	945755-56-6	JAK	16	35.9931	<1		http://www.selleckchem.com/products/xl019.html	XL019 is a potent and selective JAK2 inhibitor with IC50 of 2.2 nM, exhibiting >50-fold selectivity over JAK1, JAK3 and TYK2. Phase 1.	JAK/STAT	C25H28N6O2	Free Base	N/A	O=C(NC1=CC=C(C=C1)C1=CC=NC(NC2=CC=C(C=C2)N2CCOCC2)=N1)[C@@H]1CCCN1 |r,c:5,7,12,18,20,29,t:3,10,16|	3.106	4	3	6
S7041	CX-6258 HCl	c1	L1900-02	498.4	1353859-00-3	Pim	57	114.366	89	178.571	http://www.selleckchem.com/products/CX-6258.html	CX-6258 HCl is a potent, orally efficacious pan-Pim kinase inhibitor with IC50 of 5 nM, 25 nM and 16 nM for Pim1, Pim2, and Pim3, respectively.	JAK/STAT	C26H25Cl2N3O3	Hydrochloride	N/A	Cl.CN1CCCN(CC1)C(=O)C1=CC=CC(=C1)C1=CC=C(O1)\C=C1\C(=O)NC2=C1C=C(Cl)C=C2 |c:13,15,20,29,35,t:11,18,32|	4.416	3	1	3
S7062	Pinometostat (EPZ5676)	d1	L1900-02	562.71	1380288-87-8	Histone Methyltransferase	100	177.711	<1		http://www.selleckchem.com/products/epz-5676.html	EPZ-5676 is an S-adenosyl methionine (SAM) competitive inhibitor of protein methyltransferase DOT1L with Ki of 80 pM, demonstrating >37,000-fold selectivity against all other PMTs tested, inhibits H3K79 methylation in tumor. Phase 1.	Epigenetics	C30H42N8O3	Free Base	N/A	CC(C)N(C[C@H]1O[C@H]([C@H](O)[C@@H]1O)N1C=NC2=C1N=CN=C2N)C1C[C@H](CCC2=NC3=C(N2)C=CC(=C3)C(C)(C)C)C1 |r,c:14,16,19,21,32,36,38,t:30,@:3|	3.567	5	4	9
S7070	GSK J4 HCl	e1	L1900-02	453.96	1373423-53-0(free base)	Histone Demethylase	90	198.255	<1		http://www.selleckchem.com/products/gsk-j4-hcl.html	GSK J4 HCl is a cell permeable prodrug of GSK J1, which is the first selective inhibitor of the H3K27 histone demethylase JMJD3 and UTX with IC50 of 60 nM and inactive against a panel of demethylases of the JMJ family.	Epigenetics	C24H28ClN5O2	Hydrochloride	N/A	Cl.CCOC(=O)CCNC1=CC(=NC(=N1)C1=CC=CC=N1)N1CCC2=C(CC1)C=CC=C2 |c:10,12,17,19,25,30,32,t:8,15|	4.663	5	1	8
S7079	SGC 0946	f1	L1900-02	618.57	1561178-17-3	Histone Methyltransferase	100	161.663	<1		http://www.selleckchem.com/products/sgc-0946.html	SGC 0946 is a highly potent and selective DOT1L methyltransferase inhibitor with IC50 of 0.3 nM, is inactive against a panel of 12 PMTs and DNMT1.	Epigenetics	C28H40BrN7O4	Free Base	N/A	CC(C)N(CCCNC(=O)NC1=CC=C(C=C1)C(C)(C)C)C[C@H]1O[C@H]([C@H](O)[C@@H]1O)N1C=C(Br)C2=C1N=CN=C2N |r,c:13,15,35,38,40,t:11,32|	3.278	4	5	10
S7088	UNC1215	g1	L1900-02	529.72	1415800-43-9	Epigenetic Reader Domain	100	188.779	<1		http://www.selleckchem.com/products/nuc1215.html	UNC1215 is a potent and selective MBT (malignant brain tumor) antagonist, which binds L3MBTL3 with IC50 of 40 nM and Kd of 120 nM, 50-fold selective versus other members of the human MBT family.	Epigenetics	C32H43N5O2	Free Base	N/A	O=C(N1CCC(CC1)N1CCCC1)C1=CC(NC2=CC=CC=C2)=C(C=C1)C(=O)N1CCC(CC1)N1CCCC1 |c:21,23,25,27,t:15,19|	3.351	2	1	6
S7104	AZD1208	h1	L1900-02	379.48	1204144-28-4	Pim	75	197.639	<1		http://www.selleckchem.com/products/azd-1208.html	AZD1208 is a potent, and orally available Pim kinase inhibitor with IC50 of 0.4 nM, 5 nM, and 1.9 nM for Pim1, Pim2, and Pim3, respectively. Phase 1.	JAK/STAT	C21H21N3O2S	Free Base	N/A	N[C@@H]1CCCN(C1)C1=C(\C=C2/SC(=O)NC2=O)C=CC=C1C1=CC=CC=C1 |r,c:8,19,21,26,28,t:24|	3.283	2	2	3
S7110	(+)-JQ1	a2	L1900-02	456.99	1268524-70-4	Epigenetic Reader Domain	91	199.129	<1		http://www.selleckchem.com/products/jq1.html	(+)-JQ1 is a BET bromodomain inhibitor, with IC50 of 77 nM/33 nM for BRD4(1/2), binding to all bromodomains of the BET family, but not to bromodomains outside the BET family.	Epigenetics	C23H25ClN4O2S	Free Base	N/A	CC1=NN=C2[C@H](CC(=O)OC(C)(C)C)N=C(C3=C(SC(C)=C3C)N12)C1=CC=C(Cl)C=C1 |r,c:14,20,32,t:1,3,16,27,29|	4.953	5	0	5
S7113	Zebularine	b2	L1900-02	228.2	3690-10-6	DNA Methyltransferase	46	201.578	46	201.578	https://www.selleckchem.com/products/zebularine.html	Zebularine is a DNA methylation inhibitor that forms a covalent complex with DNA methyltransferases, also inhibits cytidinedeaminase with Ki of 2 μM.	Epigenetics	C9H12N2O5	Free Base	N/A	OC[C@H]1O[C@H](C(O)[C@H]1O)N1C=CC=NC1=O |r,c:11,13|	-1.747	3	3	2
S7120	3-deazaneplanocin A (DZNeP) HCl	c2	L1900-02	262.26	120964-45-6	Histone Methyltransferase	52	198.277	52	198.277	http://www.selleckchem.com/products/3-deazaneplanocin-a-dznep.html	3-deazaneplanocin A (DZNeP), an analog of adenosine, is a competitive inhibitor of S-adenosylhomocysteine hydrolase with Ki of 50 pM.	Epigenetics	C12H15ClN4O3	Hydrochloride	N/A	Cl.NC1=C2N=CN([C@@H]3C=C(CO)[C@@H](O)[C@H]3O)C2=CC=N1 |r,c:1,3,17,19,t:7|	-0.776	2	4	2
S7152	C646	d2	L1900-02	445.42	328968-36-1	Histone Acetyltransferase	13	29.1859	<1		http://www.selleckchem.com/products/c646.html	C646 is an inhibitor for histone acetyltransferase, and inhibits p300 with a Ki of 400 nM. Preferentially selective for p300 versus other acetyltransferases.	Epigenetics	C24H19N3O6	Free Base	N/A	CC1=NN(C(=O)C\1=C/C1=CC=C(O1)C1=CC(C)=C(C)C=C1[N+]([O-])=O)C1=CC=C(C=C1)C(O)=O |c:11,21,29,31,t:1,9,15,18,27|	4.736	4	0	5
S7189	I-BET-762	e2	L1900-02	423.9	1260907-17-2	Epigenetic Reader Domain	84	198.16	<1		http://www.selleckchem.com/products/i-bet-762.html	I-BET-762 is an inhibitor for BET proteins with IC50 of ~35 nM, suppresses the production of proinflammatory proteins by macrophages and blocks acute inflammation, highly selective over other bromodomain-containing proteins.	Epigenetics	C22H22ClN5O2	Free Base	GSK525762, GSK525762A	CCNC(=O)C[C@@H]1N=C(C2=CC=C(Cl)C=C2)C2=CC(OC)=CC=C2N2C(C)=NN=C12 |r,c:14,21,23,28,t:7,9,11,17,30|	3.288	5	1	5
S7229	RGFP966	f2	L1900-02	362.4	1396841-57-8	HDAC	72	198.675	<1		http://www.selleckchem.com/products/rgfp966.html	RGFP966 is an HDAC3 inhibitor with IC50 of 0.08 μM, exhibits > 200-fold selectivity over other HDAC.	Epigenetics	C21H19FN4O	Free Base	N/A	NC1=CC(F)=CC=C1NC(=O)\C=C\C1=CN(C\C=C\C2=CC=CC=C2)N=C1 |c:4,6,22,24,27,t:1,14,20|	3.242	2	2	6
S7231	GSK2801	g2	L1900-02	371.45	1619994-68-1	Epigenetic Reader Domain	74	199.219	<1		http://www.selleckchem.com/products/gsk2801.html	GSK2801 is a selective bromodomains <b>BAZ2A/B</b> inhibitor with <b>K<sub>D</sub></b> of 257 nM and 136 nM, respectively.	Epigenetics	C20H21NO4S	Free Base	N/A	CCCOC1=CC2=C(C=C(N2C=C1)C(C)=O)C1=C(C=CC=C1)S(C)(=O)=O |c:8,12,20,22,t:4,6,18|	3.594	4	0	6
S7233	Bromosporine	h2	L1900-02	404.44	1619994-69-2	Epigenetic Reader Domain	81	200.277	<1		http://www.selleckchem.com/products/bromosporine.html	Bromosporine is a broad spectrum inhibitor for bromodomains with IC50 of 0.41 μM, 0.29 μM, 0.122 μM and 0.017 μM for BRD2, BRD4, BRD9 and CECR2, respectively.	Epigenetics	C17H20N6O4S	Free Base	N/A	CCOC(=O)NC1=CC(=NN2C(C)=NN=C12)C1=CC(NS(C)(=O)=O)=C(C)C=C1 |c:8,12,28,t:6,14,18,25|	1.57	7	2	6
S7234	IOX1	a3	L1900-02	189.17	5852-78-8	Histone Demethylase	37	195.591	<1		http://www.selleckchem.com/products/iox1.html	IOX1 is a potent and broad-spectrum inhibitor of 2OG oxygenases, including the JmjC demethylases.	Epigenetics	C10H7NO3	Free Base	N/A	OC(=O)C1=CC=C(O)C2=NC=CC=C12 |c:10,t:3,5,8,12|	1.404	2	1	1
S7237	OG-L002	b3	L1900-02	225.29	1357302-64-7	Histone Demethylase	45	199.743	<1		http://www.selleckchem.com/products/og-l002.html	OG-L002 is a potent and specific LSD1 inhibitor with IC50 of 20 nM, exhibiting 36- and 69-fold selectivity over MAO-B and MAO-A, respectively.	Epigenetics	C15H15NO	Free Base	N/A	N[C@H]1C[C@@H]1C1=CC=C(C=C1)C1=CC=CC(O)=C1 |r,c:7,9,14,17,t:5,12|	2.47	0	2	2
S7238	NVP-TNKS656	c3	L1900-02	494.58	1419949-20-4	PARP	100	202.192	<1		http://selleckchem.com/products/nvp-tnks656.html	NVP-TNKS656 is a highly potent, selective, and orally active tankyrase inhibitor with IC50 of 6 nM for TNKS2, > 300-fold selectivity against PARP1 and PARP2.	DNA Damage	C27H34N4O5	Free Base	N/A	COC1=CC=C(C=C1)C(=O)C1CCN(CC(=O)N(CC2CC2)CC2=NC3=C(COCC3)C(=O)N2)CC1 |c:4,6,t:2,25,27|	1.014	6	1	9
S7256	SGC-CBP30	d3	L1900-02	509.04	1613695-14-9	Epigenetic Reader Domain	100	196.448	<1		http://www.selleckchem.com/products/sgc-cbp30.html	SGC-CBP30 is a potent CREBBP/EP300 inhibitor with IC50 of 21 nM and 38 nM, respectively.	Epigenetics	C28H33ClN4O3	Free Base	N/A	COC1=C(Cl)C=C(CCC2=NC3=CC(=CC=C3N2C[C@H](C)N2CCOCC2)C2=C(C)ON=C2C)C=C1 |r,c:2,13,15,30,34,38,t:5,9,11|	5.22	5	0	8
S7265	MM-102	e3	L1900-02	669.8	1417329-24-8	Histone Methyltransferase	100	149.298	100	149.298	http://www.selleckchem.com/products/mm-102.html	MM-102 is a high-affinity peptidomimetic MLL1 inhibitor with IC50 of 0.4 μM.	Epigenetics	C35H49F2N7O4	Free Base	HMTase Inhibitor IX	CCC(CC)(NC(=O)C(C)C)C(=O)N[C@@H](CCCNC(N)=N)C(=O)NC1(CCCC1)C(=O)NC(C1=CC=C(F)C=C1)C1=CC=C(F)C=C1 |r,c:40,48,t:35,37,43,45|	4.419	4	6	17
S7276	SGI-1027	f3	L1900-02	461.52	1020149-73-8	DNA Methyltransferase	92	199.341	<1		http://www.selleckchem.com/products/sgi-1027.html	SGI-1027 is a DNMT inhibitor with IC50 of 6, 8, 7.5 μM for DNMT1, DNMT3A, and DNMT3B	Epigenetics	C27H23N7O	Free Base	DNA Methyltransferase Inhibitor II	CC1=CC(NC2=CC=C(NC(=O)C3=CC=C(NC4=CC=NC5=C4C=CC=C5)C=C3)C=C2)=NC(N)=N1 |c:19,21,24,26,29,32,34,37,t:1,5,7,12,14,17|	4.718	4	4	6
S7281	JIB-04	g3	L1900-02	308.76	199596-05-9	Histone Demethylase	25	80.969	<1		http://www.selleckchem.com/products/jib-04.html	JIB-04 is a pan-selective <b>Jumonji histone demethylase</b> inhibitor with <b>IC50</b> of 230, 340, 855, 445, 435, 1100, and 290 nM for JARID1A, JMJD2E, JMJD3, JMJD2A, JMJD2B, JMJD2C, and JMJD2D in cell-free assays, respectively.	Epigenetics	C17H13ClN4	Free Base	NSC693627	[H]N(\N=C(/C1=CC=CC=C1)C1=NC=CC=C1)C1=NC=C(Cl)C=C1 |c:6,8,13,15,23,t:4,11,18,20|	4.424	3	1	4
S7292	RG2833 (RGFP109)	h3	L1900-02	339.43	1215493-56-3	HDAC	68	200.336	<1		http://www.selleckchem.com/products/rg2833-rgfp109.html	RG2833 (RGFP109) is a brain-penetrant HDAC inhibitor with IC50 of 60 nM and 50 nM for HDAC1 and HDAC3, respectively.	Epigenetics	C20H25N3O2	Free Base	N/A	CC1=CC=C(C=C1)C(=O)NCCCCCC(=O)NC1=CC=CC=C1N |c:3,5,21,23,t:1,19|	2.895	2	3	8
S7294	PFI-2 HCl	a4	L1900-02	499.52	1627676-59-8	Histone Methyltransferase	99	198.19	4	8.00769	http://www.selleckchem.com/products/pfi-2.html	PFI-2 is a potent, selective, and cell-active <b>lysine methyltransferase SETD7</b> inhibitor with <b>K<sub>i (app)</sub></b> and <b>IC50</b> of 0.33 nM and 2 nM, 1000-fold selectivity over other methyltransferases and other non-epigenetic targets.	Epigenetics	C23H25F4N3O3S	Hydrochloride	N/A	FC1=CC(=CC2=C1CNCC2)S(=O)(=O)N[C@H](CC1=CC=CC(=C1)C(F)(F)F)C(=O)N1CCCC1 |r,c:3,5,21,23,t:1,19|	3.268	3	2	7
S7295	RVX-208	b4	L1900-02	370.4	1044870-39-4	Epigenetic Reader Domain	74	199.784	<1		http://www.selleckchem.com/products/rvx-208.html	RVX-208 is a potent BET bromodomain inhibitor with IC50 of 0.510 μM for BD2, about 170-fold selectivity over BD1. Phase 2.	Epigenetics	C20H22N2O5	Free Base	RVX-000222	COC1=CC(OC)=C2C(=O)NC(=NC2=C1)C1=CC(C)=C(OCCO)C(C)=C1 |c:11,14,27,t:2,6,17,20|	2.877	5	2	6
S7296	ML324	c4	L1900-02	349.43	1222800-79-4	Histone Demethylase	43	123.058	<1		http://www.selleckchem.com/products/ml324.html	ML324 is a selective inhibitor of <b>jumonji histone demethylase (JMJD2)</b> with <b>IC50</b> of 920 nM.	Epigenetics	C21H23N3O2	Free Base	N/A	CN(C)CCCNC(=O)C1=CC=C(C=C1)C1=CC2=CC=CN=C2C(O)=C1 |c:11,13,20,22,26,t:9,16,18|	2.701	2	2	6
S7300	PJ34 HCl	d4	L1900-02	331.8	344458-15-7	PARP	66	198.915	66	198.915	http://www.selleckchem.com/products/pj34-hcl.html	PJ34 HCl is the hydrochloride salt of PJ34, which is a PARP inhibitor with EC50 of 20 nM and is equally potent to PARP1/2.	DNA Damage	C17H18ClN3O2	Hydrochloride	N/A	Cl.CN(C)CC(=O)NC1=CC2=C(NC(=O)C3=C2C=CC=C3)C=C1 |c:14,17,19,22,t:7,9|	1.811	2	2	3
S7304	CPI-203	e4	L1900-02	399.9	1446144-04-2	Epigenetic Reader Domain	79	197.549	<1		http://www.selleckchem.com/products/cpi-203.html	CPI-203 is a potent BET bromodomain inhibitor with IC50 of 37 nM for BRD4.	Epigenetics	C19H18ClN5OS	Free Base	N/A	CC1=NN=C2[C@H](CC(N)=O)N=C(C3=C(SC(C)=C3C)N12)C1=CC=C(Cl)C=C1 |r,c:10,16,28,t:1,3,12,23,25|	3.168	4	1	3
S7305	MS436	f4	L1900-02	383.42	1395084-25-9	Epigenetic Reader Domain	55	143.446	<1		http://www.selleckchem.com/products/ms436.html	MS436 is a selective <b>BET bromodomain</b> inhibitor with <b>K<sub>i</sub></b> of <0.085 μM and 0.34 μM for BRD4 (1) and BRD4 (2), respectively.	Epigenetics	C18H17N5O3S	Free Base	N/A	CC1=C(O)C=C(N)C(=C1)\N=N\C1=CC=C(C=C1)S(=O)(=O)NC1=CC=CC=N1 |c:1,7,14,16,25,27,t:4,12,23|	3.573	5	3	5
S7315	PFI-3	g4	L1900-02	321.37	1819363-80-8	Epigenetic Reader Domain	64	199.147	<1		http://www.selleckchem.com/products/pfi-3.html	PFI-3 is a selective chemical probe for <b>SMARCA bromodomains</b>, including SMARCA2, SMARCA4 and PB1(5) bromodomains.	Epigenetics	C19H19N3O2	Free Base	N/A	OC1=CC=CC=C1C(=O)\C=C\N1C[C@H]2C[C@@H]1CN2C1=NC=CC=C1 |r,c:3,5,23,25,t:1,21|	2.438	2	1	4
S7324	TMP269	h4	L1900-02	514.52	1314890-29-3	HDAC	100	194.356	<1		http://www.selleckchem.com/products/tmp269.html	TMP269 is a potent, selective class IIa HDAC inhibitor with IC50 of 157 nM, 97 nM, 43 nM and 23 nM for HDAC4, HDAC5, HDAC7 and HDAC9, respectively.	Epigenetics	C25H21F3N4O3S	Free Base	N/A	FC(F)(F)C1=NC(=NO1)C1=CC=CC(=C1)C(=O)NCC1(CCOCC1)C1=NC(=CS1)C1=CC=CC=C1 |c:6,12,14,30,36,38,t:4,10,28,34|	4.311	6	1	7
S7353	EPZ004777	a5	L1900-02	539.67	1338466-77-5	Histone Methyltransferase	100	185.298	<1		https://www.selleckchem.com/products/epz004777.html	EPZ004777 is a potent, selective DOT1L inhibitor with IC50 of 0.4 nM.	Epigenetics	C28H41N7O4	Free Base	N/A	CC(C)N(CCCNC(=O)NC1=CC=C(C=C1)C(C)(C)C)C[C@H]1O[C@H]([C@H](O)[C@@H]1O)N1C=CC2=C1N=CN=C2N |r,c:13,15,32,34,37,39,t:11|	2.529	4	5	10
S7360	OTX015	b5	L1900-02	491.99	202590-98-5	Epigenetic Reader Domain	98	199.191	<1		http://www.selleckchem.com/products/otx015.html	OTX015 is a potent BET bromodomain inhibitor with EC50 ranging from 10 to 19 nM for BRD2, BRD3, and BRD4. Phase 1.	Epigenetics	C25H22ClN5O2S	Free Base	N/A	CC1=NN=C2[C@H](CC(=O)NC3=CC=C(O)C=C3)N=C(C3=C(SC(C)=C3C)N12)C1=CC=C(Cl)C=C1 |r,c:15,18,24,36,t:1,3,10,12,20,31,33|	4.709	4	2	4
S7373	UNC669	c5	L1900-02	338.24	1314241-44-5	Epigenetic Reader Domain	11	32.5213	<1		http://www.selleckchem.com/products/unc669.html	UNC669 is a potent and selective MBT (malignant brain tumor) inhibitor with IC50 of 6 μM for L3MBTL1, 5- and 11-fold selective over L3MBTL3 and L3MBTL4.	Epigenetics	C15H20BrN3O	Free Base	N/A	BrC1=CN=CC(=C1)C(=O)N1CCC(CC1)N1CCCC1 |c:3,5,t:1|	1.413	2	0	2
S7438	ME0328	d5	L1900-02	321.37	1445251-22-8	PARP	64	199.147	<1		http://www.selleckchem.com/products/me0328.html	ME0328 is a potent and selective PARP inhibitor with IC50 of 0.89 μM for PARP3, about 7-fold selectivity over PARP1.	Epigenetics	C19H19N3O2	Free Base	N/A	C[C@H](NC(=O)CCC1=NC2=CC=CC=C2C(=O)N1)C1=CC=CC=C1 |r,c:11,13,22,24,t:7,9,20|	2.213	3	2	5
S7473	Nexturastat A	e5	L1900-02	341.4	1403783-31-2	HDAC	68	199.18	<1		http://www.selleckchem.com/products/nexturastat-a.html	Nexturastat A is a potent and selective HDAC6 inhibitor with IC50 of 5 nM, >190-fold selectivity over other HDACs.	Epigenetics	C19H23N3O3	Free Base	N/A	CCCCN(CC1=CC=C(C=C1)C(=O)NO)C(=O)NC1=CC=CC=C1 |c:8,10,22,24,t:6,20|	3.079	2	2	7
S7476	MG149	f5	L1900-02	340.46	1243583-85-8	Histone Acetyltransferase	68	199.73	<1		http://www.selleckchem.com/products/mg149.html	MG149 is a potent <b>histone acetyltransferase</b> inhibitor with <b>IC50</b> of 74 μM and 47 μM for Tip60 and MOF,respectively.	Epigenetics	C22H28O3	Free Base	N/A	CCCCCCCC1=CC=C(CCC2=C(C(O)=O)C(O)=CC=C2)C=C1 |c:13,19,21,24,t:7,9|	6.872	1	1	10
S7541	Decernotinib (VX-509)	g5	L1900-02	392.38	944842-54-0	JAK	78	198.787	<1		http://selleckchem.com/products/decernotinib-vx-509.html	Decernotinib (VX-509) is a potent and selective JAK3 inhibitor with Ki of 2.5 nM, >4-fold selectivity over JAK1, JAK2, and TYK2, respectively. Phase 2/3.	JAK/STAT	C18H19F3N6O	Free Base	N/A	CC[C@@](C)(NC1=NC(=NC=C1)C1=CNC2=NC=CC=C12)C(=O)NCC(F)(F)F |r,c:7,9,17,t:5,12,15,19|	2.747	4	3	7
S7555	4SC-202	h5	L1900-02	447.51	910462-43-0	HDAC	89	198.878	<1		http://www.selleckchem.com/products/4sc-202.html	4SC-202 is a selective class I <b>HDAC</b> inhibitor with <b>IC50</b> of 1.20 μM, 1.12 μM, and 0.57 μM for HDAC1, HDAC2, and HDAC3, respectively. Also displays inhibitory activity against <b>Lysine specific demethylase 1 (LSD1)</b>. Phase 1.	Epigenetics	C23H21N5O3S	Free Base	N/A	CN1C=C(C=N1)C1=CC=C(C=C1)S(=O)(=O)N1C=CC(\C=C\C(=O)NC2=CC=CC=C2N)=C1 |c:2,4,9,11,18,28,30,33,t:7,26|	2.955	4	2	6
S7570	UNC0379	a6	L1900-02	413.56	1620401-82-2	Histone Methyltransferase	82	198.278	<1		http://www.selleckchem.com/products/unc0379.html	UNC0379 is a selective, substrate competitive inhibitor of <b>N-lysine methyltransferase SETD8</b> with <b>IC50</b> of 7.9 μM, high selectivity over 15 other methyltransferases.	Epigenetics	C23H35N5O2	Free Base	N/A	COC1=C(OC)C=C2C(NCCCCCN3CCCC3)=NC(=NC2=C1)N1CCCC1 |c:2,20,22,25,t:6|	4.545	4	1	10
S7572	A-366	b6	L1900-02	329.44	1527503-11-2	Histone Methyltransferase	65	197.305	<1		http://selleckchem.com/products/a-366.html	A-366 is a potent and selective G9a/GLP histone lysine methyltransferase inhibitor with IC50 of 3.3nM, exhibiting >1000-fold selectivity for G9a/GLP over 21 other methyltransferases.	Epigenetics	C19H27N3O2	Free Base	N/A	COC1=C(OCCCN2CCCC2)C=C2N=C(N)C3(CCC3)C2=C1 |c:2,25,t:14,16|	2.467	3	1	6
S7574	GSK-LSD1 2HCl	c6	L1900-02	289.24	1431368-48-7	Histone Demethylase	57	197.068	57	197.068	http://www.selleckchem.com/products/gsk-lsd1-2hcl.html	GSK-LSD1 2HCl is an irreversible, and selective <b>LSD1</b> inhibitor with <b>IC50</b> of 16 nM, > 1000 fold selective over other closely related FAD utilizing enzymes (i.e. LSD2, MAO-A, MAO-B).	Epigenetics	C14H22Cl2N2	dihydrochloride	N/A	Cl.Cl.C1[C@@H](NC2CCNCC2)[C@@H]1C1=CC=CC=C1 |r,c:14,16,t:12|	1.964	0	2	3
S7581	GSK J1	d6	L1900-02	389.45	1373422-53-7	Histone Demethylase	77	197.715	<1		http://www.selleckchem.com/products/gsk-j1.html	GSK-J1 is a highly potent H3K27 <b>histone demethylase</b> inhibitor with <b>IC50</b> of 28 nM and 53 nM in cell-free assays for JMJD3 (KDM6B) and UTX (KDM6A), respectively, >10-fold selectivity over other tested demethylases.	Epigenetics	C22H23N5O2	Free Base	N/A	OC(=O)CCNC1=CC(=NC(=N1)C1=CC=CC=N1)N1CCC2=C(CC1)C=CC=C2 |c:8,10,15,17,23,28,30,t:6,13|	3.707	4	1	6
S7582	Anacardic Acid	e6	L1900-02	348.52	16611-84-0	Histone Acetyltransferase	69	197.98	<1		http://www.selleckchem.com/products/anacardic-acid.html	Anacardic Acid is a potent inhibitor of <b>p300 and p300/CBP-associated factor histone acetyltranferases</b>, which also has antibacterial activity, antimicrobial activity, prostaglandin synthase inhibition, and tyrosinase and lipoxygenase inhibition.	Epigenetics	C22H36O3	Free Base	6-pentadecylsalicylic Acid	CCCCCCCCCCCCCCCC1=CC=CC(O)=C1C(O)=O |c:17,20,t:15|	8.09	1	1	15
S7591	BRD4770	f6	L1900-02	413.47	1374601-40-7	Histone Methyltransferase	27	65.301	<1		http://www.selleckchem.com/products/brd4770.html	BRD4770 is a <b>histone methyltransferase G9a</b> inhibitor with <b>IC50</b> of 6.3 μM, and induces cell senescence.	Epigenetics	C25H23N3O3	Free Base	N/A	COC(=O)C1=CC=C2N(CCCC3=CC=CC=C3)C(NC(=O)C3=CC=CC=C3)=NC2=C1 |c:14,16,25,27,29,32,t:4,6,12,23|	5.094	4	1	8
S7605	Filgotinib (GLPG0634)	g6	L1900-02	425.5	1206161-97-8	JAK	85	199.765	<1		http://www.selleckchem.com/products/filgotinib.html	Filgotinib (GLPG0634) is a selective JAK1 inhibitor with IC50 of 10 nM, 28 nM, 810 nM, and 116 nM for JAK1, JAK2, JAK3, and TYK2, respectively. Phase 2.	JAK/STAT	C21H23N5O3S	Free Base	N/A	O=C(NC1=NN2C(C=CC=C2C2=CC=C(CN3CCS(=O)(=O)CC3)C=C2)=N1)C1CC1 |c:7,9,26,28,t:3,12,14|	2.461	5	1	5
S7610	UNC0631	h6	L1900-02	635.93	1320288-19-4	Histone Methyltransferase	100	157.25	<1		http://www.selleckchem.com/products/unc0631.html	UNC0631 is a potent <b>histone methyltransferase G9a</b> inhibitor with <b>IC50</b> of 4 nM.	Epigenetics	C37H61N7O2	Free Base	N/A	COC1=CC2=C(NC3CCN(CC4CCCCC4)CC3)N=C(N=C2C=C1OCCCN1CCCCC1)N1CCCN(CC1)C(C)C |c:4,22,24,27,t:2|	6.55	4	1	12
S7611	EI1	a7	L1900-02	390.48	1418308-27-6	Histone Methyltransferase	42	107.56	<1		http://www.selleckchem.com/products/ei1.html	EI1 is a potent and selective <b>EZH2</b> inhibitor with <b>IC50</b> of 15 nM and 13 nM for EZH2 (WT) and EZH2 (Y641F), respectively.	Epigenetics	C23H26N4O2	Free Base	N/A	CCC(CC)N1C=CC2=C(C=C(C=C12)C#N)C(=O)NCC1=C(C)C=C(C)NC1=O |c:6,10,22,t:8,12,25|	3.54	2	2	6
S7616	CPI-169	b7	L1900-02	528.66	1450655-76-1	Histone Methyltransferase	100	189.157	<1		http://www.selleckchem.com/products/cpi-169.html	CPI-169 is a potent, and selective <b>EZH2</b> inhibitor with <b>IC50</b> of 0.24 nM, 0.51 nM, and 6.1 nM for EZH2 WT, EZH2 Y641N, and EZH1, respectively.	Epigenetics	C27H36N4O5S	Free Base	N/A	CCS(=O)(=O)N1CCC(CC1)[C@@H](C)N1C2=CC=CC=C2C(C(=O)NCC2=C(OC)C=C(C)NC2=O)=C1C |r,c:17,19,27,37,t:15,31|	1.74	5	2	8
S7618	MI-2 (Menin-MLL Inhibitor)	c7	L1900-02	375.55	1271738-62-5	Histone Methyltransferase	75	199.707	<1		http://www.selleckchem.com/products/mi-2-menin-mll-inhibitor.html	MI-2 (Menin-MLL Inhibitor) is a potent <b>menin-MLL</b> interaction inhibitor with <b>IC50</b> of 446 nM.	Epigenetics	C18H25N5S2	Free Base	N/A	CCCC1=CC2=C(N=CN=C2S1)N1CCN(CC1)C1=NCC(C)(C)S1 |c:7,9,t:3,5,21|	4.161	3	0	4
S7619	MI-3 (Menin-MLL Inhibitor)	d7	L1900-02	375.55	1271738-59-0	Histone Methyltransferase	19	50.5925	<1		http://www.selleckchem.com/products/mi-3-menin-mll-inhibitor.html	MI-3 (Menin-MLL Inhibitor) is a potent <b>menin-MLL</b> interaction inhibitor with <b>IC50</b> of 648 nM.	Epigenetics	C18H25N5S2	Free Base	N/A	CC(C)C1=CC2=C(N=CN=C2S1)N1CCN(CC1)C1=NCC(C)(C)S1 |c:7,9,t:3,5,21|	4.168	3	0	3
S7620	GSK1324726A (I-BET726)	e7	L1900-02	434.91	1300031-52-0	Epigenetic Reader Domain	86	197.742	<1		http://www.selleckchem.com/products/gsk1324726a-i-bet726.html	GSK1324726A (I-BET726) is a highly selective inhibitor of <b>BET</b> family proteins with <b>IC50</b> of 41 nM, 31 nM, and 22 nM for BRD2, BRD3, and BRD4, respectively.	Epigenetics	C25H23ClN2O3	Free Base	N/A	C[C@H]1C[C@@H](NC2=CC=C(Cl)C=C2)C2=C(C=CC(=C2)C2=CC=C(C=C2)C(O)=O)N1C(C)=O |r,c:10,15,17,22,24,t:5,7,13,20|	4.648	2	1	4
S7625	Niraparib (MK-4827) tosylate	f7	L1900-02	492.59	1038915-73-9	PARP	98	198.948	<1		http://selleckchem.com/products/mk-4827-niraparib-tosylate.html	MK-4827(Niraparib) tosylate is a selective inhibitor of PARP1/PARP2 with IC50 of 3.8 nM/2.1 nM.	DNA Damage	C26H28N4O4S	4-?methylbenzen	Niraparib tosylate, MK 4827 tosylate	CC1=CC=C(C=C1)S(O)(=O)=O.NC(=O)C1=CC=CC2=CN(N=C12)C1=CC=C(C=C1)[C@@H]1CCCNC1 |r,c:3,5,16,27,29,t:1,14,18,21,25|	4.267	2	2	4
S7641	Remodelin	g7	L1900-02	363.28	1622921-15-6	Histone Acetyltransferase	72	198.194	<1		http://www.selleckchem.com/products/remodelin.html	Remodelin is a potent <b>acetyl-transferase NAT10</b> inhibitor.	Epigenetics	C15H15BrN4S	hydrochloride salt	N/A	Br.N#CC1=CC=C(C=C1)C1=CSC(NN=C2CCCC2)=N1 |c:4,6,20,t:2,9|	4.031	2	1	3
S7656	CPI-360	h7	L1900-02	437.53	1802175-06-9	Histone Methyltransferase	20	45.7112	<1		http://www.selleckchem.com/products/cpi-360.html	CPI-360 is a potent, selective,and SAM-competitive <b>EZH1</b> inhibitor with <b>IC50</b> of 102.3 nM, >100-fold selectivity over other methyltransferases.	Epigenetics	C25H31N3O4	Free Base	N/A	COC1=C(CNC(=O)C2=C(C)N([C@H](C)C3CCOCC3)C3=C2C=CC=C3)C(=O)NC(C)=C1 |r,c:2,8,21,24,26,33|	2.071	4	2	6
S7680	SP2509	a8	L1900-02	437.90	1423715-09-6	Histone Demethylase	38	86.7778	<1		http://www.selleckchem.com/products/sp2509.html	SP2509 is a selective <b>histone demethylase LSD1</b> inhibitor with <b>IC50</b> of 13 nM, showing no activity against MAO-A, MAO-B, lactate dehydrogenase and glucose oxidase.	Epigenetics	C19H20ClN3O5S	Free Base	N/A	C\C(=N/NC(=O)C1=CC=CC(=C1)S(=O)(=O)N1CCOCC1)C1=CC(Cl)=CC=C1O |c:8,10,26,28,t:6,23|	1.891	5	2	5
S7681	OF-1	b8	L1900-02	440.31	919973-83-4	Epigenetic Reader Domain	76	172.606	<1		http://www.selleckchem.com/products/of-1.html	OF-1 is a potent inhibitor of <b>BRPF1B</b> and <b>BRPF2</b> bromodomain with <b>K<sub>d</sub></b> of 100 nM and 500 nM, respectively.	Epigenetics	C17H18BrN3O4S	Free Base	N/A	COC1=CC2=C(C=C1NS(=O)(=O)C1=C(C)C=C(Br)C=C1)N(C)C(=O)N2C |c:4,6,13,19,t:2,16|	2.81	4	1	4
S7748	EPZ015666(GSK3235025)	c8	L1900-02	383.44	1616391-65-1	Histone Methyltransferase	60	156.478	<1		http://www.selleckchem.com/products/epz015666.html	EPZ015666 is a potent, selective and orally bioavailable <b>PRMT5</b> inhibitor with <b>K<sub>i</sub></b> of 5 nM, >20,000-fold selectivity over other PMTs.	Epigenetics	C20H25N5O3	Free Base	N/A	O[C@@H](CNC(=O)C1=CC(NC2COC2)=NC=N1)CN1CCC2=C(C1)C=CC=C2 |r,c:14,16,23,27,29,t:6|	1.038	4	3	7
S7767	AZ6102	d8	L1900-02	428.53	1645286-75-4	PPAR	85	198.353	<1		http://selleckchem.com/products/az6102.html	AZ6102 is a potent TNKS1/2 inhibitor that has 100-fold selectivity against other PARP family enzymes and shows IC50 of 5 nM for Wnt pathway inhibition in DLD-1 cells.	DNA Damage	C25H28N6O	Free Base	AZ-6102	C[C@H]1CN(C[C@@H](C)N1)C1=NC=C(C(C)=C1)C1=CC=C(C=C1)C1=NC2=C(C=CN2C)C(=O)N1 |r,c:11,14,19,21,28,t:9,17,24,26|	3.649	3	2	3
S7795	ORY-1001 (RG-6016) 2HCl	e8	L1900-02	303.27	1431326-61-2	Histone Demethylase	5	16.487	61	201.141	http://www.selleckchem.com/products/ory-1001-rg-6016.html	ORY-1001 (RG-6016) is an orally active and selective lysine-specific demethylase <b>LSD1/KDM1A</b> inhibitor with <b>IC50</b> of <20 nM, with high selectivity against related FAD dependent aminoxidases. Phase 1.	Epigenetics	C15H24Cl2N2	dihydrochloride	N/A	Cl.Cl.NC1CCC(CC1)N[C@@H]1C[C@H]1C1=CC=CC=C1 |r,c:15,17,t:13|	2.721	0	2	3
S7796	GSK2879552 2HCl	f8	L1900-02	437.4	1401966-69-5 (free base)	Histone Demethylase	29	66.3009	44	100.594	http://selleckchem.com/products/gsk2879552-2hcl.html	GSK2879552 2HCl is a potent, selective, orally bioavailable, irreversible LSD1 inhibitor with Kiapp of 1.7 μM. Phase 1.	Epigenetics	C23H30Cl2N2O2	dihydrochloride	N/A	Cl.Cl.OC(=O)C1=CC=C(CN2CCC(CN[C@@H]3C[C@H]3C3=CC=CC=C3)CC2)C=C1 |r,c:20,22,28,t:3,5,18|	1.586	1	1	7
S7804	GSK503	g8	L1900-02	526.67	1346572-63-1	Histone Methyltransferase	100	189.872	<1		http://www.selleckchem.com/products/gsk503.html	GSK503 is a potent and specific <b>EZH2</b> methyltransferase inhibitor.	Epigenetics	C31H38N6O2	Free Base	N/A	CC(C)N1C=C(C)C2=C1C=C(C=C2C(=O)NCC1=C(C)C=C(C)NC1=O)C1=CC=C(N=C1)N1CCN(C)CC1 |c:7,10,12,19,31,33,t:4,22,29|	4.126	3	2	6
S7805	EPZ011989	h8	L1900-02	642.27	1598383-40-4(free base)	Histone Methyltransferase	20	31.1396	<1		http://selleckchem.com/products/epz011989.html	EPZ011989 is a potent, selective, orally bioavailable EZH2 inhibitor with Ki of <3 nM.	Epigenetics	C35H52ClN5O4	hydrochloride	N/A	Cl.CCN([C@H]1CC[C@@H](CC1)N(C)CCOC)C1=C(C)C(=CC(=C1)C#CCN1CCOCC1)C(=O)NCC1=C(C)C=C(C)NC1=O |r,c:16,19,21,38,t:41|	4.287	4	2	13
S7832	SGC707	a9	L1900-02	298.34	1687736-54-4	Histone Methyltransferase	59	197.761	<1		http://selleckchem.com/products/sgc707.html	SGC707 is a potent, selective and cell-active allosteric inhibitor of protein arginine methyltransferase 3 (PRMT3) with IC50 and Kd of 31 nM and 53 nM, respectively.	Epigenetics	C16H18N4O2	Free Base	N/A	O=C(NCC(=O)N1CCCC1)NC1=CC2=CC=NC=C2C=C1 |c:17,19,22,t:13,15|	0.43	3	2	3
S7835	I-BRD9	b9	L1900-02	497.55	1714146-59-4	Epigenetic Reader Domain	99	198.975	<1		http://selleckchem.com/products/i-brd9-gsk602.html	I-BRD9 (GSK602) is a potent and selective BRD9 inhibitor with pIC50 of 7.3, while it displayed a pIC50 of 5.3 against BRD4.	Epigenetics	C22H22F3N3O3S2	Free Base	GSK602	CCN1C=C(C2=C(C=C(S2)C(=N)NC2CCS(=O)(=O)CC2)C1=O)C1=CC(=CC=C1)C(F)(F)F |c:3,7,28,30,t:5,26|	2.779	3	1	6
S8001	Ricolinostat (ACY-1215)	c9	L1900-02	433.5	1316214-52-4	HDAC	86	198.385	<1		http://www.selleckchem.com/products/rocilinostat-acy-1215.html	Rocilinostat (ACY-1215) is a selective HDAC6 inhibitor with IC50 of 5 nM. It is >10-fold more selective for HDAC6 than HDAC1/2/3 (class I HDACs) with slight activity against HDAC8, minimal activity against HDAC4/5/7/9/11, Sirtuin1, and Sirtuin2.	Epigenetics	C24H27N5O3	Free Base	N/A	ONC(=O)CCCCCCNC(=O)C1=CN=C(N=C1)N(C1=CC=CC=C1)C1=CC=CC=C1 |c:15,17,23,25,30,32,t:13,21,28|	3.917	4	2	11
S8004	ZM 39923 HCl	d9	L1900-02	367.91	1021868-92-7	JAK	30	81.5417	<1		http://www.selleckchem.com/products/zm-39923-hcl.html	ZM 39923 is an JAK1/3 inhibitor with pIC50 of 4.4/7.1, almost no activity to JAK2 and modestly potent to EGFR; also found to be sensitive to transglutaminase.	JAK/STAT	C23H26ClNO	HCl	N/A	Cl.CC(C)N(CCC(=O)C1=CC=C2C=CC=CC2=C1)CC1=CC=CC=C1 |c:12,14,17,23,25,t:8,10,21|	5.424	1	0	7
S8005	SMI-4a	e9	L1900-02	273.23	438190-29-5	Pim	55	201.296	<1		http://www.selleckchem.com/products/smi-4a.html	SMI-4a is a potent inhibitor of Pim1 with IC50 of 17 nM, modest potent to Pim-2, does not significantly inhibit other serine/threonine- or tyrosine-kinases.	JAK/STAT	C11H6F3NO2S	Free Base	N/A	FC(F)(F)C1=CC(=CC=C1)\C=C1/SC(=O)NC1=O |c:6,8,t:4|	2.884	2	1	2
S8006	BIX 01294	f9	L1900-02	600.02	1392399-03-9	Histone Methyltransferase	98	163.328	98	163.328	http://www.selleckchem.com/products/bix-01294.html	BIX01294 is an inhibitor of G9a histone methyltransferase with IC50 of 2.7 μM, reduces H3K9me2 of bulk histones, also weakly inhibits GLP (primarily H3K9me3), no significant activity observed at other histone methyltransferases.	Epigenetics	C28H41Cl3N6O2	trihydrochloride	N/A	Cl.Cl.Cl.COC1=CC2=NC(=NC(NC3CCN(CC4=CC=CC=C4)CC3)=C2C=C1OC)N1CCCN(C)CC1 |c:6,17,19,24,27,t:2,4,15|	5.246	4	1	7
S8038	UPF 1069	g9	L1900-02	279.29	1048371-03-4	PARP	56	200.508	<1		http://www.selleckchem.com/products/upf-1069.html	UPF 1069 is a selective PARP2 inhibitor with IC50 of 0.3 μM. It is ~27-fold selective against PARP1.	DNA Damage	C17H13NO3	Free Base	N/A	O=C(COC1=C2C=CNC(=O)C2=CC=C1)C1=CC=CC=C1 |c:4,6,12,14,19,21,t:17|	1.966	3	1	4
S8043	Scriptaid	h9	L1900-02	326.35	287383-59-9	HDAC	65	199.173	<1		https://www.selleckchem.com/products/scriptaid.html	Scriptaid is an inhibitor of HDAC. It shows a greater effect on acetylated H4 than H3.	DNA Damage	C18H18N2O4	Free Base	Scriptide, GCK 1026	ONC(=O)CCCCCN1C(=O)C2=CC=CC3=CC=CC(C1=O)=C23 |c:14,18,t:12,16,23|	2.119	3	1	6
S8049	Tubastatin A	a10	L1900-02	335.4	1252003-15-8	HDAC	9	26.8336	<1		http://www.selleckchem.com/products/tubastatin-a.html	Tubastatin A is a potent and selective HDAC6 inhibitor with IC50 of 15 nM. It is selective against all the other isozymes (1000-fold) except HDAC8 (57-fold).	Epigenetics	C20H21N3O2	Free Base	N/A	CN1CCC2=C(C1)C1=C(C=CC=C1)N2CC1=CC=C(C=C1)C(=O)NO |c:4,10,12,20,22,t:8,18|	3.081	1	1	3
S8056	Lomeguatrib	b10	L1900-02	326.17	192441-08-0	DNA Methyltransferase	65	199.283	<1		http://www.selleckchem.com/products/lomeguatrib.html	Lomeguatrib is a potent inhibitor of O6-alkylguanine-DNA-alkyltransferase with IC50 of 5 nM.	Epigenetics	C10H8BrN5OS	Free Base	PaTrin-2	NC1=NC2=C(NC=N2)C(OCC2=CC(Br)=CS2)=N1 |c:6,15,18,t:1,3,12|	2.131	4	2	3
S8057	Pacritinib (SB1518)	c10	L1900-02	472.58	937272-79-2	FLT3,JAK	11	23.2765	<1		http://www.selleckchem.com/products/pacritinib-sb1518.html	Pacritinib (SB1518) is a potent and selective inhibitor of Janus Kinase 2 (JAK2) and Fms-Like Tyrosine Kinase-3 (FLT3) with IC50s of 23 and 22 nM, respectively.	JAK/STAT	C28H32N4O3	Free Base	N/A	C(CN1CCCC1)OC1=CC=C2NC3=NC=CC(=N3)C3=CC(COC\C=C\COCC1=C2)=CC=C3 |c:16,18,33,35,37,t:9,11,14,21,27|	4.547	5	1	4
S8096	Mirin	d10	L1900-02	220.25	1198097-97-0	ATM/ATR	44	199.773	<1		http://selleckchem.com/products/mirin.html	Mirin is a potent Mre11–Rad50–Nbs1 (MRN) complex inhibitor, and inhibits Mre11-associated exonuclease activity.	DNA Damage	C10H8N2O2S	Free Base	N/A	OC1=CC=C(\C=C2/SC(=N)NC2=O)C=C1 |c:14,t:1,3|	1.754	1	2	1
S8111	GSK591	e10	L1900-02	380.48	1616391-87-7	Histone Methyltransferase	76	199.748	<1		http://selleckchem.com/products/gsk591-epz015866-gsk3203591.html	GSK591 (EPZ015866,GSK3203591) is a potent selective inhibitor of the arginine methyltransferase PRMT5 with IC50 of 11 nM.	Epigenetics	C22H28N4O2	Free Base	EPZ015866, GSK3203591	O[C@@H](CNC(=O)C1=CC(NC2CCC2)=NC=C1)CN1CCC2=C(C1)C=CC=C2 |r,c:14,16,23,27,29,t:6|	2.467	2	3	7
S8112	MS023	f10	L1900-02	287.40	1831110-54-3	Histone Methyltransferase	57	198.33	<1		http://selleckchem.com/products/ms023.html	MS023 is a potent, selective, and cell-active Type I PRMT inhibitor with IC50 of 30 nM, 119 nM, 83 nM, 4 nM, and 5 nM for PRMT1, PRMT3, PRMT4, PRMT6 and PRMT8, respectively.	Epigenetics	C17H25N3O	Free Base	N/A	CC(C)OC1=CC=C(C=C1)C1=CNC=C1CN(C)CCN |c:6,8,14,t:4,11|	2.396	1	2	7
S8146	Mitomycin C	g10	L1900-02	334.37	50-07-7	DNA/RNA Synthesis	67	200.377	<1		http://selleckchem.com/products/mitomycin-c.html	Mitomycin C?is an antineoplastic antibiotic by inhibiting DNA synthesis, used to treat different cancers.	DNA Damage	C15H18N4O5	Free Base	N/A	CO[C@]12[C@H]3N[C@H]3CN1C1=C([C@H]2COC(N)=O)C(=O)C(N)=C(C)C1=O |r,c:10,t:22|	-1.547	5	3	4
S8179	BI-7273	h10	L1900-02	353.41	1883429-21-7	Epigenetic Reader Domain	70	198.07	<1		http://selleckchem.com/products/bi-7273.html	BI-7273 is a potent, selective, and cell-permeable BRD9 BD Inhibitor.	Epigenetics	C20H23N3O3	Free Base	N/A	COC1=CC(=CC(OC)=C1CN(C)C)C1=CN(C)C(=O)C2=C1C=CN=C2 |c:4,8,21,24,26,t:2,15|	1.301	4	0	5
S8180	PF-CBP1 HCl	a11	L1900-02	525.08	NA	Epigenetic Reader Domain	100	190.447	100	190.447	http://selleckchem.com/products/pf-cbp1.html	PF-CBP1 is a highly selective inhibitor of the bromodomain of CREB-binding protein(CREBBP).It inhibits CREBBP and p300 bromodomains with IC50 of 125 and 363 nM respectively.	Epigenetics	C29H37ClN4O3	Hydrochloride	N/A	Cl.CCCOC1=CC=C(CCC2=NC3=CC(=CC=C3N2CCN2CCOCC2)C2=C(C)ON=C2C)C=C1 |c:14,16,30,34,38,t:4,6,10,12|	5.432	5	0	10
S8195	Oclacitinib	b11	L1900-02	453.51	1640292-55-2	JAK	90	198.452	18	39.6904	http://selleckchem.com/products/oclacitinib-maleate.html	Oclacitinib is a novel inhibitor of JAK family members with IC50 ranging from 10 to 99 nM and JAK1-dependent cytokines with IC50 ranging from 36 to 249 nM, which did not inhibit a panel of 38 non-JAK kinases.	JAK/STAT	C19H27N5O6S	maleate	PF-03394197	OC(=O)\C=C/C(O)=O.CNS(=O)(=O)C[C@H]1CC[C@@H](CC1)N(C)C1=C2C=CNC2=NC=N1 |r,c:22,24,28,30|	1.758	6	2	7
S8209	HLCL-61 HCL	c11	L1900-02	380.91	1158279-20-9	Histone Methyltransferase	76	199.522	<1		http://selleckchem.com/products/hlcl-61-hydrochloride.html	HLCL-61 hydrochloride is a potent and selective PRMT5 inhibitor for the treatment of acute myeloid leukemia.	Epigenetics	C23H25ClN2O	hydrochloride	HLCL61	Cl.CCN1C2=CC=CC=C2C2=C1C=CC(CNCC1=C(OC)C=CC=C1)=C2 |c:5,7,10,13,19,23,25,27,t:3|	5.364	1	1	6
S8323	ITSA-1 (ITSA1)	d11	L1900-02	292.12	200626-61-5	HDAC	58	198.549	<1		http://selleckchem.com/products/itsa-1-itsa1.html	ITSA-1 (ITSA1) is an HDAC activator via TSA suppression, but shows no activity towards other HDAC inhibitors.	Epigenetics	C13H7Cl2N3O	Free Base	N/A	ClC1=CC=C(C(=O)N2N=NC3=CC=CC=C23)C(Cl)=C1 |c:8,12,19,t:1,3,10,14|	4.418	3	0	1
S1149	Gemcitabine HCl	a1	L1900-03	299.66	122111-03-9	Autophagy,DNA/RNA Synthesis	<1		19	63.4052	http://selleckchem.com/products/Gemcitabine-Hydrochloride(Gemzar).html	Gemcitabine HCl is a DNA synthesis inhibitor with IC50 of 50 nM, 40 nM, 18 nM and 12 nM in PANC1, MIAPaCa2, BxPC3 and Capan2 cells, respectively.	DNA Damage	C9H12ClF2N3O4	Hydrochloride	Gemzar	Cl.NC1=NC(=O)N(C=C1)[C@@H]1O[C@H](CO)[C@@H](O)C1(F)F |r,c:6,t:1|	-1.012	3	3	2
S1215	Carboplatin	b1	L1900-03	371.25	41575-94-4	DNA/RNA Synthesis	<1		14	37.7104	http://selleckchem.com/products/Carboplatin.html	Carboplatin is a DNA synthesis inhibitor by binding to DNA and interfering with the cell's repair mechanism in A2780, SKOV-3, IGROV-1, and HX62 cells.	DNA Damage	C6H12N2O4Pt	Free Base	Paraplatin	N.N.[Pt++].[O-]C(=O)C1(CCC1)C([O-])=O	-3	0	0	2
S1373	Daptomycin	c1	L1900-03	1620.67	103060-53-3	DNA/RNA Synthesis	<1		100	61.7029	http://selleckchem.com/products/Daptomycin.html	Daptomycin is a novel antibiotic with rapid in vitro bactericidal activity against gram-positive organisms.	DNA Damage	C72H101N17O26	Free Base	LY146032	CCCCCCCCCC(=O)N[C@@H](CC1=CNC2=C1C=CC=C2)C(=O)N[C@H](CC(N)=O)C(=O)N[C@@H](CC(O)=O)C(=O)N[C@H]1[C@@H](C)OC(=O)[C@H](CC(=O)C2=CC=CC=C2N)NC(=O)[C@@H](NC(=O)[C@@H](CO)NC(=O)CNC(=O)[C@H](CC(O)=O)NC(=O)[C@@H](C)NC(=O)[C@H](CC(O)=O)NC(=O)[C@H](CCCN)NC(=O)CNC1=O)[C@@H](C)CC(O)=O |r,c:17,20,22,56,58,t:14,54|	-7.895	21	18	35
S1384	Mizoribine	d1	L1900-03	259.22	50924-49-7	DNA/RNA Synthesis	1	3.85773	52	200.602	http://selleckchem.com/products/Mizoribine.html	Mizoribine is an imidazole nucleoside, selectively inhibits inosine monophosphate synthetase and guanosine monophosphate synthetase.	DNA Damage	C9H13N3O6	Free Base	HE 69	NC(=O)C1=C(O)N(C=N1)[C@@H]1O[C@H](CO)[C@@H](O)[C@H]1O |r,c:3,7|	-2.409	3	5	3
S1648	Cytarabine	e1	L1900-03	243.22	147-94-4	DNA/RNA Synthesis	1	4.1115	48	197.352	http://selleckchem.com/products/Cytarabine(Cytosar-U).html	Cytarabine is an antimetabolic agent and DNA synthesis inhibitor with IC50 of 16 nM in wild-type CCRF-CEM cells.	DNA Damage	C9H13N3O5	Free Base	N/A	NC1=NC(=O)N(C=C1)[C@@H]1O[C@H](CO)[C@@H](O)[C@@H]1O |r,c:6,t:1|	-2.396	3	4	2
S1826	Nedaplatin	f1	L1900-03	303.17	95734-82-0	DNA/RNA Synthesis	<1		18	59.3726	http://selleckchem.com/products/nedaplatin-aqupla.html	Nedaplatin is a derivative of cisplatin and DNA damage agent for tumor colony forming units with IC50 of 94 μM.	DNA Damage	R + C2H2O3Pt -> R [+ C2H2O3Pt]	Free Base	N/A	[*].[*].O=C1CO[Pt]O1 |$;H3N_R0;;H3N_R0;;;;;;$|	1.142	3	0	0
S1995	Procarbazine HCl	g1	L1900-03	257.76	366-70-1	DNA/RNA Synthesis	<1		52	201.738	http://selleckchem.com/products/procarbazine-hydrochloride-matulane.html	Procarbazine HCl is a hydrochloride salt form of procarbazine which is a polyfunctional alkylating compound, used for the treatment of Hodgkin's lymphoma.	DNA Damage	C12H20ClN3O	Hydrochloride	N/A	Cl.CNNCC1=CC=C(C=C1)C(=O)NC(C)C |c:6,8,t:4|	1.12	1	3	5
S7419	Blasticidin S HCl	h1	L1900-03	458.9	3513-03-9	DNA/RNA Synthesis	<1		91	198.3	http://selleckchem.com/products/blasticidin-s-hcl.html	Blasticidin S HCl is a nucleoside antibiotic isolated from Stretomyces girseochromogenes, and acts as a DNA and protein synthesis inhibitor, used to select transfected cells carrying bsr or BSD resistance genes.	DNA Damage	C17H27ClN8O5	hydrochloride salt	Blasticidine S HCl	Cl.CN(CC[C@H](N)CC(=O)N[C@H]1C=CC(O[C@@H]1C(O)=O)N1C=CC(N)=NC1=O)C(N)=N |r,c:11,21,24,@@:20|	-5.035	5	4	9
S8197	APTSTAT3-9R	a2	L1900-03	4947.51	NA	STAT	10	2.02122	100	20.2122	http://selleckchem.com/products/aptstat3-9r.html	APTSTAT3-9R is a specific STAT3-binding peptide with addition of a cell-penetrating motif. The treatment of APTSTAT3-9R in various types of cancer cells blocks STAT3 phosphorylation and reduces expression of STAT targets.	JAK/STAT	C223H330N80O51	Free Base	N/A	[H]C(NC(=O)C([H])NC(=O)C([H])NC(=O)C(CCCCN)NC(=O)C(CC(C)C)NC(=O)C(CC1=CC=CC=C1)NC(=O)C(CCC(N)=O)NC(=O)C(CC1=CC=C(O)C=C1)NC(=O)C(C)NC(=O)C([H])NC(=O)C(CCCCN)NC(=O)C(CC1=CNC2=C1C=CC=C2)NC(=O)C(NC(=O)C(CC1=CNC2=C1C=CC=C2)NC(=O)C(CCCCN)NC(=O)C([H])NC(=O)C(CC(N)=O)NC(=O)C(CCC(O)=O)NC(=O)C(CC1=CNC2=C1C=CC=C2)NC(=O)C(NC(=O)C(CC1=CNC2=C1C=CC=C2)NC(=O)C(CO)NC(=O)C([H])NC(=O)C1CCCN1C(=O)C(CC1=CNC2=C1C=CC=C…	-24.945	45	74	170

## Sheet: Table S3
Supplementary Table 3. Sequences for primers used in quantitive RT-PCR
Gene	Forward Primer	Reverse Primer
CCNA2	CTCTACACAGTCACGGGACAAAG	CTGTGGTGCTTTGAGGTAGGTC
CCNB1	CCAGAACCTGAGCCAGAACC	GTGACTTCCCGACCCAGTAG
CCNE1	AGAGGAAGGCAAACGTGACC	TTGTCAGGTGTGGGGATCAG
CCNE2	TAGCTGGTCTGGCGAGGTT	ACAGGTGGCCAACAATTCCT
CDC6	GGAGATGTTCGCAAAGCACTGG	GGAATCAGAGGCTCAGAAGGTG
CDK1	TGGAAATTGAGCGGAGAGCG	CATGGCTACCACTTGACCTG
CDK2	ATCTTTGCTGAGATGGTGACT	TGGCCGAAATCCGCTTGT
E2F1	ACAAGGCCCGATCGATGTTT	GTTCTTGCTCCAGGCTGAGT
E2F2	TCGGTATGACACTTCGCTGG	TGCCTACCCACTGGATGTTG
E2F3	GGCTGGAGCTAGGAGAAAGC	AGAGACGTATCATACCGCGT
E2F4	CAGAGGGTCTCAATGGGCAG	AAACAGCAGATGGGCTCTGG
FEN1	AAGGGAGAGCGAGCTTAGGA	ATGTCATTCTCCCGGATGGC
MCM3	GTGGAGTCATCCTGGGAACC	CTGGTCTTCCTCGTCGTCCA
MCM6	CTCCGCCAGAGAGATGGTTC	ACCAGCACCCTCATCTACCT
POLA1	CTGTGAGATAGGGGCGAGTG	CCAGTCATCATCCTGGCGTG
TOP2A	GGGGTCCTGCCTGTTTAGTC	GGGGTCCTGCCTGTTTAGTC
TYMS	GTACCTGGGGCAGATCCAAC	ACACCCTTCCAGAACACACG
GAPDH	ACGGATTTGGTCGTATTGGG	ATCTCGCTCCTGGAAGATGG
